1 *The genome of New Zealand trevally (Carangidae:*  
2 *Pseudocaranx georgianus) uncovers a XY sex*  
3 *determination locus*

4

5 Mike Ruigrok<sup>1,2</sup>, Andrew Catanach<sup>3</sup>, Deepa Bowatte<sup>4</sup>, Marcus Davy<sup>5</sup>, Roy Storey<sup>5</sup>, Noémie Valenza-  
6 Troubat<sup>1</sup>, Elena López-Girona<sup>4</sup>, Elena Hilario<sup>6</sup>, Matthew J. Wylie<sup>1</sup>, David Chagné<sup>4</sup> and Maren  
7 Wellenreuther<sup>1,7</sup>

8 <sup>1</sup> *The New Zealand Institute for Plant & Food Research Ltd, Nelson, New Zealand*

9 <sup>2</sup> *Department of Bioinformatics, University of Applied Sciences Leiden, the Netherlands*

10 <sup>3</sup> *The New Zealand Institute for Plant & Food Research Ltd, Christchurch, New Zealand*

11 <sup>4</sup> *The New Zealand Institute for Plant & Food Research Ltd, Palmerston North, New Zealand*

12 <sup>5</sup> *The New Zealand Institute for Plant & Food Research Ltd, Te Puke, New Zealand*

13 <sup>6</sup> *The New Zealand Institute for Plant & Food Research Ltd, Auckland, New Zealand*

14 <sup>7</sup> *School of Biological Sciences, The University of Auckland, Auckland, New Zealand*

15

16

17 \* *Corresponding author*

18 Maren Wellenreuther: [Maren.Wellenreuther@plantandfood.co.nz](mailto:Maren.Wellenreuther@plantandfood.co.nz)

19

20 *Keywords: Pseudocaranx georgianus, sex determination, Teleost, aromatase cyp19a1a, cyp19b,*  
21 *cytochrome P450 aromatase, genomics, sex system, Carangidae, molecular sex markers,*  
22 *aquaculture and assembly*

23 *Running title: Genomics of sex in trevally*

## 24 Abstract

25 **Background:** The genetic control of sex determinism in teleost species is poorly  
26 understood. This is partly because of the diversity of sex determining mechanisms in  
27 this large group, including constitutive genes linked to sex chromosomes, polygenic  
28 constitutive mechanisms, environmental factors, hermaphroditism, and unisexuality.  
29 Here we use a *de novo* genome assembly of New Zealand silver trevally  
30 (*Pseudocaranx georgianus*) together with whole genome sequencing to detect  
31 sexually divergent regions, identify candidate genes and develop molecular makers.

32 **Results:** The *de novo* assembly of an unsexed trevally (Trevally\_v1) resulted in an  
33 assembly of 579.4 Mb in length, with a N50 of 25.2 Mb. Of the assembled scaffolds,  
34 24 were of chromosome scale, ranging from 11 to 31 Mb. A total of 28416 genes  
35 were annotated after 12.8% of the assembly was masked with repetitive elements.  
36 Whole genome re-sequencing of 13 sexed trevally (7 males, 6 females) identified  
37 sexually divergent regions located on two scaffolds, including a 6 kb region at the  
38 proximal end of chromosome 21. Blast analyses revealed similarity between one  
39 region and the aromatase genes *cyp19 (a1a/b)*. Males contained higher numbers of  
40 heterozygous variants in both regions, while females showed regions of very low  
41 read-depth, indicative of deletions. Molecular markers tested on 96 histologically-  
42 sexed fish (42 males, 54 females). Three markers amplified in absolute  
43 correspondence with sex.

44 **Conclusions:** The higher number of heterozygous variants in males combined with  
45 deletions in females support a XY sex-determination model, indicating the  
46 trevally\_v1 genome assembly was based on a male. This sex system contrasts with  
47 the ZW-type sex system documented in closely related species. Our results indicate  
48 a likely sex-determining function of the *cyp19b*-like gene, suggesting the molecular  
49 pathway of sex determination is somewhat conserved in this family. Our genomic  
50 resources will facilitate future comparative genomics works in teleost species, and  
51 enable improved insights into the varied sex determination pathways in this group of  
52 vertebrates. The sex marker will be a valuable resource for aquaculture breeding  
53 programmes, and for determining sex ratios and sex-specific impacts in wild fisheries  
54 stocks of this species.

## 55 Introduction

56 The genetic basis of sex determination (SD) in animals has long fascinated  
57 researchers due to the relationship of this trait with reproduction and Darwinian  
58 fitness (Mank et al. 2006; Mank and Avise 2009). Traditionally, sex determination  
59 was assumed to be a relatively conserved trait across vertebrates. However, recent  
60 research on teleost fishes has shown that this is not the case, and that teleosts  
61 display a remarkable diversity in the ways sex is determined. These different  
62 mechanisms, which include heterogamety for males (males XY females XX) or  
63 heterogamety for females (males ZZ females ZW), multiple sex chromosomes and  
64 genes determining sex, environmental influences (temperature-dependent),  
65 epigenetic sex determination and hermaphroditism, have each originated numerous  
66 and independent times in teleosts (Volf 2005; Mank and Avise 2009; Piferrer 2013).  
67 The evolutionary lability of SD, and the corresponding rapid rate of turn-over among  
68 different modes, makes the teleost clade an excellent model to test theories  
69 regarding the evolution of SD adaptations (Sandra and Norma 2010; Yamamoto et  
70 al. 2019).

71 Teleosts consist of over 30,000 species, making them the largest group of  
72 vertebrates (Nelson et al. 2016). This diversity in species corresponds to a high  
73 phenotypic diversity and associated capacity of adaptation in physiological,  
74 morphological and behavioural traits. Reproductive systems vary largely, and  
75 strategies range from gonochorism, proterandrous, protogynous and simultaneous  
76 hermaphroditism (Devlin and Nagahama 2002). These reproductive strategies  
77 emerged independently in different lineages demonstrating a polyphyletic origin.  
78 Looking across fish families and genera, the genetic basis of tSD can be profoundly  
79 different, and can also be determined entirely by external factors, e.g. social  
80 structure or attainment of a critical age (Pla et al. 2021). Importantly, it should be  
81 noted that for most fish species it is unknown how sex is genetically determined and  
82 what the genetic architecture is (e.g. monogenic vs polygenic architecture).

83 The New Zealand silver trevally *Pseudocaranx georgianus* (hereafter referred to as  
84 trevally) also known as 'araara', its indigenous Māori name, is a teleost fish species  
85 of the family Carangidae. This family consists of approximately 30 genera which

86 together contain for around 151 species worldwide (Fricke et al. 2018), yet SD has  
87 only been studied in a few species of this family. These studies have revealed that  
88 all of the carangids species are gonochoristic and that SD is genetically controlled  
89 (Crabtree et al. 2002; Devlin and Nagahama 2002; Graham and Castellanos 2005),  
90 which means that each individual has to be either a genetic male or female and is  
91 incapable of changing sex. Trevally is a pelagic species and abundant in the coastal  
92 waters of Oceania, spanning from the coastal regions of the North Island and the top  
93 of the South Island of New Zealand to southern Australia (Kailola 1993; Smith-Vaniz  
94 and Jelks 2006; Papa et al. 2020). The fish grows to a maximum length of 1.2 m and  
95 18 kg, and can reach 25 years (Bray 2020). Their bodies are elongated, with the  
96 upper portion being bluish-silver, the lower portion of the fish is silver and the sides  
97 are yellow silver in colour (see Figure 1A, Bray 2020). They commonly school with  
98 size similar individuals and forage on plankton and bottom invertebrates (Smith-  
99 Vaniz and Jelks 2006).

100 Trevally is a highly sought after sashimi species in Asia, and several countries are  
101 trying to establish aquaculture breeding programmes (e.g. Valenza-Troubat et al. in  
102 press). Adults of this species are sexually monomorphic externally, as observed in  
103 other carangids (Moriwake et al. 2001; Mylonas et al. 2004). Trevally have a firm  
104 musculature around their abdominal cavity, making manual sexing difficult. Thus, sex  
105 can typically only be determined subsequent to lethal sampling or by gonopore  
106 cannulation to retrieve a gonadal biopsy. This technique, however, can only be  
107 applied to broodstock in the advanced stages of gametogenesis shortly before or  
108 during the reproductive season and can injure the fish. Sexual maturation takes 3-4  
109 years in captivity, meaning that sex information can only be gathered following that  
110 stage. Hence, understanding the genetic basis of SD in trevally would allow the  
111 design of molecular markers to facilitate sexing of the individuals early in life and in a  
112 less-invasive way.

113 The overarching goal of the study was to identify the genetic underpinnings of SD in  
114 trevally. To achieve this, we 1) *de novo* assembled a reference genome and 2)  
115 identified sexually-divergent genomic regions based on sequencing depth and  
116 variant detection using whole genome re-sequencing of male and female fish. Then,  
117 3) candidate genes for SD were identified and 4) molecular markers were designed

118 and validated using individuals sexed by gonadal histology. We discuss our findings  
119 about SD in this species and highlight the resulting applications, and compare them  
120 to other teleost species to draw general conclusions about SD in this group.

## 121 **Materials and Methods**

### 122 **Broodstock collection and rearing of F<sub>1</sub> offspring**

123 The trevally samples used in this study were collected from a founding (F<sub>0</sub>) wild-  
124 caught captivity-acclimated population and a captive-bred (F<sub>1</sub>) generation produced  
125 by the New Zealand Institute for Plant and Food Research Limited (PFR) in Nelson,  
126 New Zealand. All fish were maintained under an ambient natural photoperiod and  
127 ambient water temperatures of filtered flow-through seawater. Fish were fed daily by  
128 hand to satiation on a diet consisting of a commercial pellet feeds (Skretting and/or  
129 Ridely) supplemented with frozen squid (*Nototodarus spp*) and an in-house mixed  
130 seafood diet enriched with vitamins.

131 F<sub>0</sub> broodstock (n=21; mean body weight 1.4 ± 0.5 kg; mean fork length 44.3 ± 5.6  
132 cm) were captured from two trawl fishing tows from the North Taranaki Bight (Lat.  
133 3845267- Long. 17420626 and Lat. 3851887- Long. 17419780) during February  
134 2012. Captured fish were transported to the Wakefield Key Finfish Facility (formerly  
135 operated by PFR in Nelson, New Zealand) and acclimated to a single 4400 L tank.  
136 Broodstock (remaining n=19) were later transferred to the Maitai Finfish Facility  
137 (currently operated by PFR in Nelson, New Zealand) in 2014 and were acclimated to  
138 a single 13000 L tank.

139 Spawning was induced to produce the F<sub>1</sub> population in December 2015 when the  
140 ambient water temperature had reached 17.9 °C. In brief, the tank was fitted with an  
141 external passive egg collector and broodstock (mean body weight 3.5 ± 0.9 kg; mean  
142 fork length 51.4 ± 3.7 cm) received an intraperitoneal injection of human chorionic  
143 gonadotropin (Chorulon®) at a target dose of 600 IU/ kg bodyweight. Following  
144 injection, two individuals died at three and five days post-injection. The egg collector  
145 was checked daily (between 8 am and 9 am) for spawned eggs. Egg release was  
146 first observed at 48 h days post-injection, and at approximately 7-9 days post-  
147 injection, 50 g of buoyant eggs were collected for incubation over three consecutive

148 days (fertilisation rates and egg production metrics were unreported). Eggs were  
149 transferred to individual 450 L upwelling conical incubators supplied with gentle  
150 aeration and ambient seawater (temp range: 19.4-21.7°C). At hatching, F<sub>1</sub> larvae  
151 were combined into a single 5,000L tank where they were fed enriched rotifers  
152 (*Brachionus plicatilis*), newly hatched artemia nauplii (*Artemia franciscana*) and  
153 reared using a semi-static green water rearing protocol. When larvae reached a  
154 notochord length of ~7 mm, they were weaned onto fully enriched fully enriched  
155 *Artemia salina* followed by dry crumb (O.range, INVE Aquaculture) and an in-house  
156 wet-diet consisting of minced seafood. At approximately 77 days post-hatching, all  
157 fish were transferred into a single 63,000 L tank for on-growing under the husbandry  
158 conditions described above.

159 In 2017, a single two-year-old F<sub>1</sub> juvenile was sampled for the genome assembly  
160 (section Genome sequencing and assembly), while 7 additional fish were sampled to  
161 quantify tissue specific RNA expression and to annotate the genome (tissues  
162 sampled: skin, white muscle, gill, liver, kidney, brain and heart tissues) (section RNA  
163 extraction for transcriptome sequencing). Three-year-old F<sub>1</sub> individuals (n=96) were  
164 lethally sexed and sampled in 2018 and used for validation of the sex marker.

## 165 **Genome sequencing and assembly**

### 166 **DNA extraction for genome sequencing**

167 Liver and heart tissues were collected from a two-year-old F<sub>1</sub> individual and  
168 immediately preserved in RNAlater (Sigma-Aldrich, St Louis, USA) as recommended  
169 by the manufacturer. Total genomic DNA was extracted from a subsample of each  
170 white muscle tissue (~20 mg) placed in 750 µL of CTAB buffer (2%  
171 hexadecyltrimethyl ammonium bromide, 2% polyvinyl pyrrolidinone K40, 2 M NaCl,  
172 25 mM EDTA, 100 mM Tris-HCl pH 8.0) containing 2% β-mercaptoethanol. Tissue  
173 was disrupted by hand with a sterile plastic pestle until a homogeneous mixture was  
174 obtained. Homogenised samples were then extracted twice by vortexing with one  
175 volume of chloroform:isoamyl alcohol (CIA, 24:1) for 10 sec to remove the denatured  
176 proteins and centrifuged at 16,000 g for 5 min to separate solid and aqueous  
177 phases. The final aqueous phase was then transferred to a new 1.5 mL screw  
178 capped tube and the genomic DNA was precipitated by adding 0.7 volumes of room

179 temperature isopropanol and left to precipitate at -20 °C for at least 1 h. DNA was  
180 collected by centrifugation at room temperature for 10 min at 16,000 *g*. The DNA  
181 pellet was washed with 1 mL of 70% ethanol (v/v). After all traces of ethanol were  
182 removed by air drying, DNA was slowly dissolved in 100 µL sterile TE buffer (10 mM  
183 Tris-HCl pH 7.5, 1 mM EDTA) at 4 °C overnight. RNA was removed by adding 4 µL  
184 of RNase A (100 mg/µL) to the DNA and incubating for 5 min at room temperature.  
185 Following RNase treatment, samples were subjected to a final CTAB extraction as  
186 described above. The final DNA pellet was dissolved in 100 µL of TE buffer and  
187 quantified by fluorescence (Qubit™ HS dsDNA kit Invitrogen). DNA quality was  
188 assessed by standard gel electrophoresis (1% agarose in 1X TAE buffer, 40 mM  
189 Tris-acetate, 1 mM EDTA at pH 8.3) and by pulse field gel electrophoresis in 1%  
190 Certified™ Megabase Agarose (Bio-Rad) in 1X TAE buffer. The average fragment  
191 size of the DNA was 40 kb

## 192 **Genome assembly**

### 193 **Short-insert library preparation, sequencing, and assembly**

194 Dovetail Genomics (Scotts Valley, CA, USA) was contracted to conduct the *de novo*  
195 sequencing project, which consisted of a short insert library and two long range  
196 libraries (Hi-C and Chicago). The Illumina short insert library was prepared with  
197 randomly fragmented DNA according to the manufacturer's instructions. The library  
198 was sequenced on an Illumina HiSeq X platform using paired-end (PE) 150 bp  
199 sequencing. The data were trimmed for low-quality bases and adapter contamination  
200 using Trimmomatic and Jellyfish (Marçais and Kingsford 2011) with an in-house  
201 software to profile the short insert reads at a variety of k-mer values (25, 43, 55, 85  
202 and 109) to estimate the genome size, and fit negative binomial models to the data.  
203 The resulting profiles suggested a k-mer size of 43 was optimal for assembly. The  
204 contigs were assembled into scaffolds using Meraculous (Chapman et al. 2011), with  
205 a k-mer size of 43, a minimum k-mer frequency of 12, and the diploid nonredundant  
206 haplotigs mode.

### 207 **Chicago library preparation and sequencing**

208 Second, following the *de novo* assembly with Meraculous, a Chicago library was  
209 prepared according to the methods described in Putnam et al. (2016). Briefly, ~500



210 ng of high molecular weight genomic DNA was reconstituted *in vitro* into chromatin  
211 and subsequently fixed with formaldehyde. The fixed chromatin was then digested  
212 with DpnII, the 5' overhangs were filled in with biotinylated nucleotides and free blunt  
213 ends were ligated. After ligation, crosslinks were reversed and the DNA was purified  
214 from any protein. The purified DNA was then treated to remove biotin that was not  
215 internal to ligated fragments and the resulting DNA was sheared to ~350 bp mean  
216 fragment size using a Bioruptor Pico. Sequencing libraries were prepared from the  
217 sheared DNA using NEBNext Ultra enzymes (New England Biolabs, Inc.) and  
218 Illumina-compatible adapters. The biotin-containing fragments were isolated using  
219 streptavidin beads before PCR enrichment of each library. The amplified libraries  
220 were finally sequenced on an Illumina HiSeq X platform using PE 150 reads to  
221 approximately 90X depth.

## 222 [Dovetail Hi-C library preparation and sequencing \(multiple libraries\)](#)

223 Third, a Dovetail Hi-C library was prepared from the heart tissue preserved in  
224 RNAlater following the procedures outlined in Lieberman-Aiden et al. (2009). Briefly,  
225 formaldehyde was used to fix chromatin in place in the nucleus, which was then  
226 extracted and digested with DpnII. The 5' overhangs were filled with biotinylated  
227 nucleotides, and free blunt ends were ligated. After ligation, the crosslinks were  
228 reversed and the DNA was purified from remaining protein. Biotin that was not  
229 internal to ligated fragments was removed from the purified DNA, which was  
230 subsequently sheared to ~350 bp mean fragment size using a Bioruptor Pico. The  
231 sequencing libraries were then prepared using NEBNext Ultra enzymes and Illumina-  
232 compatible adapters. Before PCR enrichment of the library, biotin-containing  
233 fragments were isolated using streptavidin beads. The resulting library was  
234 sequenced on an Illumina HiSeq X Platform using PE 150 reads to approximately  
235 60X depth.

## 236 [Assembly scaffolding with HiRise](#)

237 To scaffold and improve the trevally *de novo* assembly, Dovetail staff input the  
238 Meraculous assembly, along with the shotgun reads, Chicago library reads, and  
239 Dovetail Hi-C library reads into the HiRise pipeline (Putnam et al. 2016) to conduct  
240 an iterative analysis. First, the shotgun and Chicago library sequences were aligned



241 to the draft contig assembly using a modified SNAP read mapper  
242 (<http://snap.cs.berkeley.edu>). Second, the separations of Chicago read pairs  
243 mapped within draft scaffolds were analysed to produce a likelihood model for  
244 genomic distance between read pairs. This model was used to identify and break  
245 putative misjoins, score prospective joins, and make joins above a threshold. Finally,  
246 after aligning and scaffolding the draft assembly using the Chicago data, the Chicago  
247 assembly was aligned and scaffolded using Dovetail Hi-C library sequences  
248 following the same method. After scaffolding, the short-insert sequences were used  
249 to close remaining gaps between contigs where possible.

#### 250 **Assembly polishing and contiguity statistics**

251 After receiving the assembly from Dovetail, *de novo* repeats were identified using  
252 RepeatModeler v1.0.11 (<http://www.repeatmasker.org/RepeatModeler.html>) with the  
253 NCBI search engine (rmbblast version). Repeats were classified by RepeatModeler  
254 into simple, tandem and interspersed repeats and masked using RepeatMasker  
255 v4.0.5 (Smit and Hubley 2008).

#### 256 **RNA extraction for transcriptome sequencing**

257 Skin, white muscle, gill, liver, kidney, brain and heart tissues were collected from five  
258 randomly selected F<sub>1</sub> and immediately placed in RNAlater. RNA was extracted from  
259 the five replicates with the CTAB buffer described above as follows: approximately  
260 50 mg of tissue were processed as for the DNA preps until the aqueous phase was  
261 obtained after the second CIA extraction. At this point the aqueous phase was  
262 precipitated with 0.35 volumes of 8 M LiCl, mixed by inversion and incubated at 4 °C  
263 overnight. The RNA was collected by centrifugation at 16,000 g in a refrigerated  
264 micro centrifuge. The pellet was dissolved in 500 µL SSTE buffer (1 M NaCl, 0.5%  
265 SDS, 1 mM EDTA, 10 mM Tris-HCl pH 8.0) and extracted once with an equal  
266 volume of CIA. The aqueous phase was collected after 10 min centrifugation at  
267 16,000 g and precipitated with 2 volumes of 100% ethanol. The RNA was collected  
268 by centrifugation at 16,000 g and washed with 1 mL of 70% ethanol, then air dried at  
269 room temperature for approximately 30 min. The RNA was dissolved in 200 µL  
270 sterile deionized water. The RNA quality was assessed by absorbance ratios  
271 (260/280 nm and 260/230 nm) and was quantified by absorbance at 260 nm. The

272 samples were DNase-treated with the Ambion® TURBO DNA-free™ kit (Thermo-  
273 Fisher Scientific, Waltham, MS, USA) as directed by the manufacturer. The RNA  
274 quality and quantity were assessed by absorbance, as described above. The  
275 fragment-size distribution was assessed by capillary electrophoresis using a  
276 Fragment Analyzer (Advanced Analytical, Parkersburg, WV, USA), using the High  
277 Sensitivity RNA Analysis kit.

278 The RNA samples were sequenced at the Australian Genome Research Facility  
279 (AGRF). The best replicate from each tissue was selected for the transcriptome data  
280 set by preparing TrueSeq libraries (Illumina, San Diego, CA, USA). The rest of the  
281 samples were prepared with the Lexogen QuantSeq 3'mRNA kit (Lexogen, Wien,  
282 Austria) for the expression analysis data set.

### 283 **Genome annotation**

284 Automated gene models were predicted using the BRAKER2 pipeline v2.1.0 (Hoff et  
285 al. 2018) with trevally RNA sequences and the trevally genome assembly as input.  
286 Gene and genome completeness were evaluated using BUSCO v3.0.2 (Simão et al.  
287 2015) using the vertebrata\_odb9 lineage set (containing 2586 genes). Functional  
288 annotations were assigned to the gene models using blastx (Aitschul 1990) to search  
289 for similarities between the translated transcriptome gene-locus models and a  
290 peptide database using 88,504 peptide sequences of *Danio rerio* and 39,513 peptide  
291 sequences of *Seriola lalandi* (downloaded from NCBI using E-utilities version 11.4,  
292 7<sup>th</sup> September 2020). The results from these searches were merged with species-  
293 specific genome-wide annotation for Zebrafish (*Danio rerio*) provided in the package  
294 org.Dr.eg.db (Carlson 2019), using Entrez stable gene identifiers (Maglott et al.  
295 2007) and Genbank accessions to annotate BLASTX alignments of gene models.  
296 Common Gene Locus (gene model g1 .. g28000) from blast reports were also used  
297 to marry up Zebrafish, and Kingfish accession and description information.

### 298 **Whole genome sequencing of sexed F<sub>0</sub> broodstock**

299 Sampling of the 13 remaining broodstock (of the original 21) took place during  
300 February 2017. Fin tissue (fin clips) were placed directly into chilled 96% ethanol,  
301 heated to 80 °C for 5 minutes within 1 hour of collection, and then stored at -20 °C.  
302 Total genomic DNA was extracted as follows: approximately 20 mg of fin tissue were

303 added to a mixture of 400  $\mu$ L extraction buffer (0.4 M NaCl, 10 mM Tris-HCl pH 8.0,  
304 and 2 mM EDTA pH 8.0) and 80  $\mu$ L of 10% SDS. The sample was incubated at 80°C  
305 for 5 min and immediately cooled on ice. Ten microliters of Proteinase K (10 mg/mL)  
306 were added and mixed by inversion. The sample was incubated at 56 °C for 1.5 h.  
307 The insoluble material was removed by centrifugation at 16,000  $g$  for 5 min. The  
308 supernatant was transferred to a new micro centrifuge tube and the proteins were  
309 salted out by adding 320  $\mu$ L 5 M NaCl and mixing by inversion. The denatured  
310 proteins were collected by centrifugation at 16,000  $g$  for 5 min. The clear supernatant  
311 was transferred to a new micro centrifuge tube and the RNA was removed by adding  
312 5  $\mu$ L RNase A 100  $\mu$ g/ $\mu$ L, incubated at room temperature for 5 min. The sample was  
313 centrifuged at 16,000  $g$  for 5 min and the supernatant was transferred to a new micro  
314 centrifuge tube. The DNA was precipitated with 525  $\mu$ L isopropanol and incubated at  
315 -20°C overnight, prior to collection by centrifugation at 16,000  $g$  for 10 min. The  
316 pellet was washed with 1 mL of 70% ethanol, dried and resuspended in 100  $\mu$ L TE  
317 buffer. DNA quality was assessed by absorbance ratios (260/280 nm and 260/230  
318 nm) and the quantified by fluorescence (Qubit™ HS dsDNA kit, Invitrogen). The  
319 integrity of the DNA was assessed by capillary electrophoresis using the High  
320 Sensitivity Genomic DNA Analysis kit on the Fragment Analyzer (Illumina). Short  
321 insert (300 bp) libraries (Illumina) were prepared and sequenced by AGRF (PE  
322 reads, 125 b long).

### 323 Whole genome sequence read alignment and variant detection

324 FASTQ files of reads belonging to the 13 sexed F<sub>0</sub> broodstock were quality filtered  
325 using Trimmomatic v0.36 (Bolger et al. 2014) with a sliding window size of 4, a  
326 quality cut-off of 15 and the minimum read length set at 50. Filtered FASTQ files  
327 were aligned to the reference genome Trevally\_v1 using BWA-MEM v0.7.17 (Li  
328 2013). Aligned BAM files of two sequencing lanes per individual fish were merged  
329 using Samtools v1.7 (Li et al. 2009). Read groups were added and duplicates were  
330 removed from merged BAM files using Picard Tools v2.18.7, and sorted and indexed  
331 using Samtools. Variant calling was done on the whole cohort of 13 fish using  
332 freebayes-parallel v1.1.0 (<https://github.com/freebayes>).

### 333 **Genome-wide detection of sex-linked variants**

334 Two strategies were used for detecting sex-linked regions using the re-sequencing  
335 data from the 13 sexed broodstock (Supplementary Figure 1). A read-depth based  
336 approach was employed by exploiting the difference in sex chromosome ploidy  
337 between males and females. For this, alignments to scaffolds shorter than 3000 bp  
338 were excluded from bam files using an in-house BASH script with AWK  
339 (Supplementary Material, Read\_depth\_analysis.ipynb). Read-depth was calculated  
340 per base using Samtools v1.7 (Li et al. 2009). A variant density approach was  
341 employed, searching for differences in SNPs and insertion-deletion (indels) density  
342 between males and females. To identify sexually divergent regions, the VCF data  
343 were converted to genotypes using the R package VCFR (R version: v4.3.3,  
344 package-version: v1.12.0). At each variant position, frequencies of genotypes were  
345 calculated for males and females, factorized per base position with the Python v3.6.5  
346 factorize module and prepared in an array, which consisted of three columns: male  
347 frequency, female frequency and genotype variants in the form of integers (this  
348 included indels). This array increased or decreased in size based on the number of  
349 variants that were present on a given base position. This array was used as input for  
350 the Python chi2\_contingency module  
351 ([https://docs.scipy.org/doc/scipy/reference/generated/scipy.stats.chi2\\_contingency.ht](https://docs.scipy.org/doc/scipy/reference/generated/scipy.stats.chi2_contingency.html)  
352 [ml](https://docs.scipy.org/doc/scipy/reference/generated/scipy.stats.chi2_contingency.html)), from which p-values and their corresponding scaffold and location were  
353 extracted and stored in a variant divergence file.

354 With R v3.5.0 all base positions from the variant divergence file (file with indel and  
355 SNP divergence per scaffold and location) were converted into windows of 500  
356 bases and the mean p-value over these windows was calculated, the same was  
357 done for depth with the created depth files (the files that store depth values per  
358 scaffold). The windows of depth were then submitted in a t-test, after separating the  
359 windows by sex, with p-values as output. A fixation index (Fst) was calculated with  
360 VCFtools v0.1.14 (Danecek et al. 2011) with an Fst window size of 500 base pairs to  
361 create windows of the same genomic regions as the other tests, with the initial VCF  
362 file as input.

363 The 500 base pair windows with their corresponding p-values (from the read depth t-  
364 test and chi-square genotype test) and Fst (from the VCF file) were filtered by sorting

365 these values from high to low based on their differential value with a BASH AWK  
366 script (Supplementary Material, Analysis\_and\_primer\_creation.ipynb). The top  
367 windows were investigated with Integrative Genomics Viewer IGV v2.3 (Robinson et  
368 al. 2011) for a quick overview of the genomic differences in terms of depth and  
369 SNPs, from these sexually divergent regions were noted (big differences in depth or  
370 SNPs). The sexually divergent regions found were then investigated on their exact  
371 numbers of indel and hetero and homozygosity to infer the sex system. To do this,  
372 the sexually divergent regions and random regions of the same size from the earlier  
373 created VCF file with Bcftools v1.9 (Narasimhan et al. 2016) were indexed and  
374 extracted into VCF files that only contained the data of these regions, after which the  
375 data was converted to a genotype format from which a generic Python script counted  
376 deletions and hetero/homozygous SNP data relative to sex, which was later  
377 converted to a ratio by dividing the allele male count with the allele female count.

### 378 Identification of candidate genes related to sex determination

379 Teleost SD candidate genes were identified and compiled from publications from  
380 1998 and onwards using the search terms “sex determination, *Pseudocaranx*  
381 *georgianus*, Carangidae, Perciformes, teleost, fish in combination with sex  
382 determination and sex genes” in Google Scholar (parsed from 01/09/2019 to  
383 01/10/2019). Sequences of candidate genes were downloaded from NCBI and used  
384 to query the trevally reference genome Trevally\_v1 using BLASTN v2.2.25 (Chen et  
385 al. 2015), filtering for E-values < 1e-10, and alignment lengths and bit scores greater  
386 than 99.

### 387 Sex phenotyping for marker development

388 For the development and validation of a molecular sex marker in trevally, gonadal  
389 and fin tissues were collected from three-year-old F<sub>1</sub> individuals (n=96). In brief, fish  
390 were subjected to complete sedation and euthanasia by overdose in anaesthetic (>  
391 50 ppm AQUI-S®; Aqwi-S New Zealand Ltd, Lower Hutt, New Zealand) followed by  
392 cervical dislocation with a sharp knife.

393 A fragment of gonadal tissue was dissected and fixed in a solution of 4%  
394 formaldehyde-1% glutaraldehyde for at least 48 h at 4 °C. Fixed samples were then  
395 dehydrated through an ethanol series before being embedded in paraffin (Paraplast,

396 Leica Biosystems Richmond Inc, Richmond IL, USA). Serial sections cut to a  
397 thickness of 5  $\mu\text{m}$  were obtained using a microtome (Leica RM2125RT, Leica  
398 Microsystems Nussloch GmbH, Germany) and stained in Gill 2 hematoxylin (Thermo  
399 Scientific Kalamazoo, MI, USA) and counterstained with eosin. Histological sections  
400 were examined under a light compound microscope (Olympus BX50) for the  
401 presence of oocytes or spermatogonia and photographed with a digital camera  
402 (Nikon DS-Ri2) to confirm the sex of each individual.

#### 403 **Sex marker development and validation**

404 Fin clips were collected from the 96 individual  $F_1$  fish and placed directly into chilled  
405 96% ethanol, heated to 80  $^{\circ}\text{C}$  for 5 minutes and then stored in a -20  $^{\circ}\text{C}$  freezer. Total  
406 genomic DNA was extracted as described above. Three types of genetic markers  
407 were developed in the sex-linked regions. PCR primers were designed using the  
408 Primer3 v4.1.0 web application. Y-specific markers were designed using male  
409 sequences where there is an absolute deletion for females, so that PCR only  
410 amplifies the Y allele. Gene-based primers were designed with default parameters  
411 using the trevally ortholog of *cyp19a1a* from *Seriola lalandi* (HQ449733.1). PCR  
412 primers for High Resolution Melting (HRM) were designed around the sexually  
413 divergent SNPs by flanking the SNPs with 100 bp on each side.

414 HRM markers were screened using PCR conditions and mix described in Guitton et  
415 al. (2012) using genomic DNA extracted from fin clips of these fish. Y-allele specific  
416 and candidate gene-based markers were screened as sequence-characterized  
417 amplified regions (SCAR) markers as described in Bus et al. (2008). PCR primers  
418 conditions were first tested on eight individual samples to verify PCR amplification  
419 and presence (in males) absence (in females) polymorphism, then screened on the  
420 population of 96 sexed fish.

## 421 **Results**

### 422 **Genome sequencing and assembly**

423 In total, 412,758,157 paired-end Illumina short reads were generated from an  $F_1$   
424 unsexed trevally, of which 97.4% were retained after trimming. K-mer analysis (k=43)  
425 resulted in 0.71% of heterozygous SNPs and an estimated genome size of 646 Mb.



426 The total input sequencing data pre-assembly was approximately 121 Gb, which is  
427 equivalent to 187.3× coverage.

428 The whole genome assembly yielded 2,006 scaffolds greater than 1 kb, for a total  
429 assembly size of 579.4 Mb (89% of estimated genome) and a N50 (scaffold) of 25.2  
430 Mb. Of this total assembly, 574.8 Mb (99.2% of the total assembly and 88.8% of the  
431 k-mer estimated genome size) were assembled into 24 chromosome-size scaffolds  
432 ranging from 11 Mb to 31 Mb in length and corresponding to the expected karyotype  
433 of trevally (Table 1). The remaining scaffolds (<0.8% of the total assembly) that could  
434 not be anchored to pseudo-chromosomes were smaller, ranging from 1 kb to 51.2 kb  
435 in size.

#### 436 Repeat and gene annotation

437 A total of 12.8% of the genome was masked for repeats. BUSCO analysis of the  
438 anchored Trevally\_v1 genome yielded a complete BUSCO score of 92.4% with 2364  
439 % being single copy and 27% being duplicated copies (134 were fragmented and 61  
440 missing). In total, 28416 protein-coding gene models were detected.

#### 441 Whole genome re-sequencing and sex-determining regions mapping

442 A total of 107.8 Gb of Illumina short reads were produced for the 13 trevally F0  
443 broodstock individuals. In total 16,576890 variants were detected, including  
444 14,355149 and 2,221741 SNPs and indels, respectively. Chi-square and t-tests both  
445 found significant SNPs, indels and depth differences on two scaffolds (Figure 2B and  
446 C). The chi-square test using SNPs and indels detected significant hits with a –  
447 log<sub>10</sub>P value of 0.58 to 2.73 for the 1 to 3,000 bp region of scaffold\_000374  
448 including 66 significant SNPs. Scaffold\_000374 is a small unanchored scaffold of 3.7  
449 kb in length. A –log<sub>10</sub>P value of 0.75 to 2.82 was found for the 1 to 6,000 bp region  
450 of scaffold\_001800 (chromosome 21) including 78 SNPs. Scaffold\_001800 is a large  
451 pseudo-chromosome scaffold of 27.7 Mb in length (denoting chromosome 21) and  
452 the sex-linked region is at the end of this scaffold. The t-test using read depth had a  
453 differential –log<sub>10</sub>P ranging from 4.04 to 5.42 across the 1 to 3,000 bp region of  
454 scaffold\_000374 and a differential –log<sub>10</sub>P ranging from 4.05 to 6.33 for the 1 to  
455 6,000 bp region of scaffold\_001800 (chromosome 21).



456

## Model for sex determination

457 The ratio of heterozygous and homozygous SNPs between males and females was  
458 0.64 and 0.69 for scaffold\_000374 and chromosome 21 (scaffold\_001800),  
459 respectively (Table 2). This ratio is lower in non-linked (randomly selected and same  
460 sized) scaffolds (average of 0.05 and 0.11 respectively). There are more  
461 heterozygous variants in males than females in both candidate sex-linked regions  
462 (299 and 263 in favour of males), which is indicative of a XY system. Female sex-  
463 linked regions were identified by the presence of deletion variants (185 and 233 per  
464 *de novo* reference scaffold, respectively) on the female re-sequenced reads that  
465 were not called (or present) on male-reads. We found variant sites that were  
466 heterozygous for all the males and homozygous for all females (3 sites against  
467 scaffold\_000374 and 8 on chromosome 21 (scaffold\_001800)). In contrast, we did  
468 not find homozygote sites for the males that were heterozygous for the females  
469 (indicative of a XX/XY system), whilst the other way around 0 instances were  
470 detected (signs of a ZZ/ZW system).

## 471 Identification of candidate genes related to sex determination

472 A total of 32 research publications were found and from these, a total of 132  
473 candidate SD genes collated, of which 64 were unique (Supplementary Table 1). We  
474 used these 64 candidate genes as queries to search the trevally reference genome  
475 using BLAST and we produced 6119 matches (prior to filtering), of which 31 were  
476 found in the two sex-linked scaffolds with E-values ranging from 1.00E-25 to 9.00E-  
477 22 and high identity rates ranging from 78.98 to 88.07 (Table 3). Every hit within the  
478 sex-linked region impacted one of two genes; *Cyp19b* and *Cyp19a1a*.

## 479 Sex marker development and validation

480 In total, three types of markers were designed and tested based on the *Cyp19a1a*  
481 candidate gene (n=5, Supplementary Table 2), using Y-allele (n=15, Supplementary  
482 Table 3) and specific amplification and HRM (n=15, Supplementary Table 4),  
483 respectively. All of the 15 HRM markers successfully amplified PCR products,  
484 however none of them were scorable or linked to sex based on a subset of eight  
485 samples (4 males and 4 females). Of the 15 Y-allele specific markers, one of them  
486 gave a clear PCR amplification product that was only present in the males and

487 absent for the females. Of the 96 trevally for which the sex was confirmed by  
488 gonadal histology, all agreed with the prediction from this Y-allele specific marker  
489 (Figure 2A). Of the markers designed by amplifying large fragments of the *cyp19*  
490 candidate gene, two amplified a PCR product present in all males and absent from  
491 the females (Figure 2B).

## 492 Discussion

493 In contrast to mammals and birds, cold-blooded vertebrates, and in particular teleost  
494 fishes, show a variety of strategies for sexual reproduction (Heule et al. 2014). Here  
495 we present the first near-complete genome assembly of New Zealand trevally  
496 (*Pseudocaranx georgianus*) and one of the first for a carangid species, and use this  
497 and whole-genome variation of males and females to identify sex linked regions. A  
498 genome assembly for California yellowtail (*Seriola dorsalis*) was developed,  
499 however, it was not resolved into pseudo-chromosome scale scaffolds (Purcell et al.  
500 2018). Our assembly covers the 24 chromosomes expected from the family  
501 Carangidae and is highly-contiguous and only includes a small proportion of  
502 scaffolds that could not be anchored to any of the 24 chromosomes. The trevally  
503 genome will be useful to assemble other Carangidae fragmented genomes based on  
504 synteny, such as other *Seriola* spp. which are economically important for aquaculture  
505 around the globe (Corriero et al. 2021). We demonstrate the usefulness of this  
506 genome assembly and annotation for mapping the SD locus, which supports a  
507 XX/XY model for trevally and enabled us to develop robust PCR-based markers for  
508 sex identification in this species. We discuss these findings and outline resulting  
509 applications and implications, and provide insights how our results improve the  
510 overall understanding of the genetics of sex determination in teleost fishes.

511 We chose two strategies to reveal the genomic regions linked to SD in trevally. First,  
512 we screened for genomic variants that were commonly, or always, in the  
513 heterozygous state in one sex and a homozygous state in the other. We discovered  
514 two regions with high numbers of variants seen in the heterozygous state in all seven  
515 male fish assessed, which were homozygous in all six female fish assessed. One  
516 region was approximately 6 kb and located at the proximal end of a chromosome-  
517 scale scaffold (Chromosome 21), while the other region spans most of a short 3.7 kb

518 scaffold (scaffold\_000374). The second strategy was based on read-depth variation  
519 between the sexes. We found higher read-depth in males compared to females  
520 along the same two scaffolds. Because the re-sequenced females showed some  
521 deletions compared to the reference Trevally\_v1 assembly, we now hypothesise that  
522 the unsexed juvenile fish used as a specimen for genome assembly must have been  
523 a male. Our results also underscore the need for studies to go beyond SNPs in their  
524 data analysis and to include the wider spectrum of structural genomic variants,  
525 including copy number repeats such as insertions, duplication and deletions, as well  
526 as fusions, fissions and translocations, to increase the power of SD detection and to  
527 better detail the full extent of sexually divergent regions (Wellenreuther et al. 2019;  
528 Mérot et al. 2020). An increasing number of studies, including on teleost species  
529 (Catanach et al. 2019), reveal that structural genomic variants encompass more  
530 genome-wide bp variants compared to SNPs, and thus hold an enormous potential  
531 to act as a potent substrate in processes involved in the eco-evolutionary divergence  
532 of species.

533 The region linked to sex determination on the pseudo-chromosome scaffold\_001800  
534 (Chromosome 21) is small (~6 kb), and could have been easily missed with other  
535 methods involving less comprehensive variant detection, such as reduced-  
536 representation genotyping by sequencing. This illustrates how our strategy, using a  
537 full genome assembly coupled with the full re-sequencing of sexed individuals,  
538 efficiently enabled us to pinpoint this region, develop sex-specific markers, and  
539 identify a candidate gene. Interesting, the sex-linked short scaffold\_000374 may be  
540 unanchored due to difficulties in resolving the genome assembly in the SD region.  
541 The divergence between the Y and X alleles may have prevented the Meraculous  
542 assembler from collapsing both haplotypes. Long read sequencing and a phased  
543 assembly would be useful to resolve this issue in the future.

544 Our results provide strong evidence that two small genomic regions form the major  
545 part of the SD locus of trevally. The presence of a *Cyp19b*-like gene within these  
546 sex-associated regions, strongly implicates a role of this gene in the sex  
547 determination of this species. No reads from female fish aligned to the gene  
548 sequence and male-specific PCR amplification of markers based on the *Cyp19b*-like  
549 gene indicates that it is specific to male fish and suggests it might play a role in the

550 masculinisation of genetically male fish. Further research is required to elucidate  
551 what the role of *Cyp19b*-like is, and better understand its function in SD gene of  
552 trevally. Previous research has demonstrated that *Cyp19* catalyses the irreversible  
553 conversion of the androgen's androstenedione and testosterone into the oestrogens  
554 estrone and estradiol, respectively (Piferrer and Blázquez 2005).

555 Recent genomic investigations have detailed that the two variants of the *Cyp19 gene*  
556 (*cyp19a1a* and *cyp19b*) were derived from the teleost specific whole genome  
557 duplication (3R) and evolved through sub-functionalization (Lin et al. 2020). Variant  
558 A (*cyp19a1a*) is restricted to the gonads (mainly the ovary), whereas the B variant  
559 (*cyp19b*) is expressed in the brain and the pituitary (Kazeto et al. 2003). When  
560 looking at studies of the genus *Seriola*, which is in the same family as trevally,  
561 variant A is only expressed in the ovaries (Koyama et al. 2019). For males, the  
562 presence of this gene appears to be related to spermatogenesis and testicular  
563 development in some species (Schulz and Miura 2002), something that is also found  
564 in other vertebrates species outside of teleosts (Robertson et al. 1999). Stage-  
565 specific gene expression during spermatogenesis in European bass (*Dicentrarchus*  
566 *labrax*) gonads, for example, has revealed that *cyp19a1a* at lower levels has a  
567 regulatory effect at the initial stages of spermatogenesis (Viñas and Piferrer 2008). In  
568 addition to this regulatory effect, *cyp19a1a* has also been implicated in the  
569 differentiation of sex in black porgy (*Acanthopagrus schlegeli*), where high levels  
570 were expressed during early testicular development (Wu et al. 2008b). Females still  
571 have higher expression than males of this gene at any ontogenetic stages, however.  
572 This is probably because next to regulation and differentiation of the ovary at higher  
573 levels during early sex differentiation (Kwon et al. 2001), for females this gene is also  
574 an important factor in the female reproductive cycle (Guiguen et al. 1999).

575 Variant B, which resides mostly in the brain, is attributed to the control of  
576 reproduction and behaviour related to sex. RT-PCR analysis of the hermaphroditic  
577 mangrove killifish (*Rivulus marmoratus*) showed that *cyp19b* is expressed in both the  
578 male and hermaphroditic fish, whilst *cyp19a* was completely absent in males (Lee et  
579 al. 2006). In addition, a study where *cyp19b* levels were artificially lowered in male  
580 guppy (*Poecilia reticulata*) showed these fish experience a reduction in the  
581 performance of male specific behaviours (Hallgren et al. 2006). Females also

582 express *cyp19b*, but this expression is mainly restricted to the period around  
583 spawning. Work on both zebrafish (*Danio rerio*) and channel catfish (*Ictalurus*  
584 *punctatus*) show an increase in *cyp19b* right before the onset and during spawning,  
585 while a decrease and low levels *cyp19b* are found outside of the reproductive period  
586 (Kazeto et al. 2003). Taken together, these studies are consistent with a *cyp19b*  
587 being more male linked compared to *cyp19a*, and conversely, that *cyp19a* is  
588 associated with female phenotypes.

589 Sex chromosomes in teleosts, can either be distinguishable cytologically  
590 (heteromorphic) or appear identical (homomorphic). In both cases, one sex is  
591 heterogametic (possessing two different sex chromosomes and hence producing two  
592 types of gametes) and the other one homogametic (a genotype with two copies of  
593 the same sex chromosome, producing only one type of gamete). A male-  
594 heterogametic system is called an XX-XY system, and female-heterogametic  
595 systems are denoted as ZZ-ZW, and both types can be found side by side in closely  
596 related species (Heule et al. 2014). Close relatives of trevally show the ZW/ZZ type  
597 of sex-determination; e.g. the Japanese amberjack (*Seriola quinqueradiata*).  
598 Evidence for a ZW/ZZ type of sex-determination would come from a higher number  
599 of heterozygous SNPs in females combined with a higher number of deletions in  
600 males (the latter would be hinting at a lack of the W-chromosome) (Fuji et al. 2010).  
601 Yet in trevally the opposite is seen. When examining the SD region between the  
602 sexes, we found that in all instances males were heterozygous while all females  
603 were homozygous. A similar pattern was seen in the number of deletions. Of the 418  
604 deletions detected, all of these were located in females, whereas none was located  
605 in males. Taken together, this all strongly indicates that trevally has XX-XY sex  
606 determining system.

607 Other teleost fish with a similar XX-XY sex determining mechanism have been well  
608 described. In the Atlantic cod (*Gadus morhua*), studies found deletions in females  
609 (hinting lack of a Y-chromosome) and male showed high SNP heterozygosity on the  
610 sex determination gene *zKY* (Kirubakaran et al. 2016) (confirmed with diagnostic  
611 PCR). In Medaka (*Oryzias latipes*) the XX-XY sex chromosomes were determined  
612 using genetic crosses and the tracking of sex linked markers (Matsuda et al. 2002).  
613 Recent studies have also revealed the putative sex gene for two carangids, the

614 greater amberjacks (*Seriola dumeril*) and Californian yellowtails (*Seriola dorsalis*),  
615 (Fuji et al. 2010). Biochemical analyses in greater amberjacks showed a missense  
616 SNP in the Z-linked allele of 17 $\beta$ -hydroxysteroid dehydrogenase 1 gene (Hsd17b1)  
617 (Viñas and Piferrer 2008). In Californian yellowtails, Hsd17b1 was found in the SDR,  
618 identified by deletions in the female sex, like the SDR in trevally, however, females  
619 and not males were heterogametic in yellowtails (Purcell et al. 2018). The Hsd17b1  
620 gene catalyzes the interconversion of estrogens (estrone $\leftrightarrow$ estradiol) and  
621 androgens (androstenedione $\leftrightarrow$  and testosterone). The Hsd17b1 gene can thus be  
622 classified as an estradiol-synthesizing sex determination gene, just like cyp19 (Fuji et  
623 al. 2010), because cyp19 converts androgens to estradiol (testosterone $\rightarrow$ estradiol).

## 624 **Conclusions**

625 As a greater number of fish genomes are sequenced, it is likely that more genes  
626 involved in the regulation of sex will be discovered. This will provide much needed data  
627 for future comparative genomic work to track the evolutionary processes and  
628 patterns governing sex evolution across close and distant teleost lineages. Given  
629 the importance of trevally and other carangid species for aquaculture production  
630 (e.g. *Seriola*) and wild fisheries (Papa et al. 2020), our reference genome will  
631 contribute to accelerating marker-assisted breeding programs, and will aid  
632 genomics-informed fisheries management programmes, by providing insights into  
633 sex ratios and sex specific effects (Bernatchez et al. 2017). This genome assembly  
634 for trevally will be a substantial resource for a variety of research applications such  
635 as population genomics and functional genomics, in both cultured and wild  
636 populations of this and other carangid species. The developed resources will future  
637 studies into teleost evolution, specifically the evolution of sex determination, which  
638 has proven to be a complex and highly variable trait in fish.

639

## 640 Acknowledgements

641 We would like to acknowledge the PFR staff that assisted with the breeding and  
642 husbandry operation of the trevally populations; in particular Warren Fantham who  
643 oversees the larvae rearing of finfish and Therese Wells who manages the post-  
644 juvenile trevally husbandry. We would also like to thank Associate Professor P. Mark  
645 Lokman, University of Otago, for his assistance with the histological processing of  
646 gonadal tissues. This research was funded through the MBIE Endeavour  
647 Programme “Accelerated breeding for enhanced seafood production” (#C11X1603)  
648 to MW.

649



## 650 References

- 651 Aitschul S 1990. Basic local alignment search tool. *J Mol Biol.* 215: 403-410.
- 652 Bernatchez L, Wellenreuther M, Araneda C, Ashton DT, Barth JMI, Beacham TD,  
653 Maes GE, Martinsohn JT, Miller KM, Naish KA, Ovenden JR, Primmer CR, Ho YS,  
654 Therkildsen NO, Withler R 2017. Harnessing the power of genomics to secure the  
655 future of seafood. *Trends Ecol Evol.* 9: 665-680.
- 656 Böhne A, Heule C, Boileau N, Salzburger W 2013. Expression and sequence  
657 evolution of aromatase *cyp19a1* and other sexual development. *Physiology.* 162:  
658 303-309.
- 659 Bolger AM, Lohse M, Usadel B 2014. Trimmomatic: a flexible trimmer for Illumina  
660 sequence data. *Bioinformatics.* 30(15): 2114-2120.
- 661 Bray DJ 2020. Silver Trevally, *Pseudocaranx georgianus* (Cuvier 1833). . In *Fishes*  
662 *of Australia.*
- 663 Bus VGM, Chagné D, Bassett HCM, Bowatte D, Calenge F, Celton JM, Durel CE,  
664 Malone MT, Patocchi A, Ranatunga AC, Rikkerink EHA, Tustin DS, Zhou J, Gardiner  
665 SE 2008. Genome mapping of three major resistance genes to woolly apple aphid  
666 (*Eriosoma lanigerum* Hausm.). *Tree Genetics & Genomes.* 4(2): 223-236.
- 667 Carlson M 2019. org.Dr.eg.db: Genome wide annotation for Zebrafish. R package  
668 version 3.8.2. .
- 669 Catanach A, Deng C, Charles D, Bernatchez L, Wellenreuther M 2019. The genomic  
670 pool of standing structural variation outnumbers single nucleotide polymorphism by  
671 more than three-fold in the marine teleost *Chrysophrys auratus*. *Mol Ecol.* 28(6):  
672 1210-1223.
- 673 Chapman JA, Ho I, Sunkara S, Luo S, Schroth GP, Rokhsar DS 2011. Meraculous:  
674 de novo genome assembly with short paired-end reads. *PLoS one.* 6(8): e23501.
- 675 Chen Y, Ye W, Zhang Y, Xu Y 2015. High speed BLASTN: an accelerated  
676 MegaBLAST search tool. *Nucleic acids research.* 43(16): 7762-7768.
- 677 Corriero A, Wylie MJ, Nyuji M, Zupa R, Mylonas CC 2021. Reproduction of greater  
678 amberjack (*Seriola dumerili*) and other members of the family Carangidae. *Reviews*  
679 *in Aquaculture.*
- 680 Crabtree RE, Hood PB, Snodgrass D 2002. Age, growth, and reproduction of permit  
681 (*Trachinotus falcatus*) in Florida waters. *Fishery Bulletin.* 100(1): 26-34.
- 682 Danecek P, Auton A, Abecasis G, Albers CA, Banks E, DePristo MA, Handsaker RE,  
683 Lunter G, Marth GT, Sherry ST, McVean G, Durbin R 2011. The variant call format  
684 and VCFtools. *Bioinformatics.* 27(15): 2156-2158.
- 685 Devlin RH, Nagahama Y 2002. Sex determination and sex differentiation in fish: an  
686 overview of genetic, physiological, and environmental influences. *Aquaculture.* 208.

- 687 Dooley CM, Schwarz H, Mueller KP, Mongera A, Konantz M, Neuhauss SC,  
688 Nüsslein-Volhard C, Geisler R 2013. Slc45a2 and V-ATPase are regulators of  
689 melanosomal pH homeostasis in zebrafish, providing a mechanism for human  
690 pigment evolution and disease. *Pigment cell & melanoma research*. 26(2): 205-217.
- 691 Forconi M, Canapa A, Barucca M, Biscotti MA, Capriglione T, Buonocore F, Fausto  
692 AM, Makapedua DM, Pallavicini A, Gerdol M 2013. Characterization of sex  
693 determination and sex differentiation genes in *Latimeria*. *PloS one*. 8(4): e56006.
- 694 Fricke R, Eschmeyer W, Van der Laan R 2018. Catalog of fishes: genera, species,  
695 references. California Academy of Sciences, San Francisco, CA, USA  
696 [http://researcharchive](http://researcharchive.calacademy.org/research/ichthyology/catalog/fishcatmain.asp) calacademy.org/research/ichthyology/catalog/fishcatmain.asp.
- 697 Fuji K, Yoshida K, Hattori K, Ozaki A, Araki K, Okauchi M, Kubota S, Okamoto N,  
698 Sakamoto T 2010. Identification of the sex-linked locus in yellowtail, *Seriola*  
699 *quinqueradiata*. *Aquaculture*. 308: S51-S55.
- 700 Graham RT, Castellanos DW 2005. Courtship and spawning behaviors of carangid  
701 species in Belize. *Fishery Bulletin*. 103(2): 426-432.
- 702 Guan G, Kobayashi T, Nagahama Y 2000. Sexually Dimorphic Expression of Two  
703 Types of DM (Doublesex/Mab-3)-Domain Genes in a Teleost Fish, the Tilapia  
704 (*Oreochromis niloticus*)-Volume 272, Number 3 (2000), pages 662-666. *Biochemical*  
705 *and Biophysical Research Communications*. 3(277): 781.
- 706 Guiguen Y, Baroiller JF, Ricordel MJ, Iseki K, McMeel O, Martin SAM, Fostier A  
707 1999. Involvement of estrogens in the process of sex differentiation in two fish  
708 species: the rainbow trout (*Oncorhynchus mykiss*) and a tilapia (*Oreochromis*  
709 *niloticus*). *Molecular Reproduction and Development: Incorporating Gamete*  
710 *Research*. 54(2): 154-162.
- 711 Guitton B, Kelner J-J, Velasco R, Gardiner SE, Chagné D, Costes E 2012. Genetic  
712 control of biennial bearing in apple. *J Exp Bot*. 63(1): 131-149.
- 713 Gunter HM, Clabaut C, Salzburger W, Meyer A 2011. Identification and  
714 characterization of gene expression involved in the coloration of cichlid fish using  
715 microarray and qRT-PCR approaches. *Journal of molecular evolution*. 72(2): 127-  
716 137.
- 717 Gutbrod H, Scharl M 1999. Intragenic sex-chromosomal crossovers of *Xmrk*  
718 oncogene alleles affect pigment pattern formation and the severity of melanoma in  
719 *Xiphophorus*. *Genet*. 151(2): 773-783.
- 720 Hallgren SL, Linderöth M, Olsén KH 2006. Inhibition of cytochrome p450 brain  
721 aromatase reduces two male specific sexual behaviours in the male Endler guppy  
722 (*Poecilia reticulata*). *General and Comparative Endocrinology*. 147(3): 323-328.
- 723 Hattori RS, Murai Y, Oura M, Masuda S, Majhi SK, Sakamoto T, Fernandino JI,  
724 Somoza GM, Yokota M, Strüssmann CA 2012. A Y-linked anti-Müllerian hormone  
725 duplication takes over a critical role in sex determination. *PNAS*. 109(8): 2955-2959.

- 726 Heule C, Salzburger W, Böhne A 2014. Genetics of sexual development: an  
727 evolutionary playground for fish. *Genet.* 196(3): 579-591.
- 728 Hoff KJ, Lomsadze A, Stanke M, Borodovsky M 2018. BRAKER2: incorporating  
729 protein homology information into gene prediction with GeneMark-EP and  
730 AUGUSTUS. *Plant and Animal Genomes XXVI*.
- 731 Ijiri S, Kaneko H, Kobayashi T, Wang D-S, Sakai F, Paul-Prasanth B, Nakamura M,  
732 Nagahama Y 2008. Sexual dimorphic expression of genes in gonads during early  
733 differentiation of a teleost fish, the Nile tilapia *Oreochromis niloticus*. *Biology of*  
734 *reproduction.* 78(2): 333-341.
- 735 Kailola PJ 1993. Australian fisheries resources: Fisheries Research and  
736 Development Corp.
- 737 Kamiya T, Kai W, Tasumi S, Oka A, Matsunaga T, Mizuno N, Fujita M, Suetake H,  
738 Suzuki S, Hosoya S 2012. A trans-species missense SNP in *Amhr2* is associated  
739 with sex determination in the tiger pufferfish, *Takifugu rubripes* (fugu). *PLoS Genet.*  
740 8(7): e1002798.
- 741 Kazeto Y, Goto-Kazeto R, Place A, Trant J 2003. Aromatase expression in zebrafish  
742 and channel catfish brains: changes in transcript abundance associated with the  
743 reproductive cycle and exposure to endocrine disrupting chemicals. *Fish Physiology*  
744 *and Biochemistry.* 28(1): 29-32.
- 745 Kirubakaran TG, Grove H, Kent MP, Sandve SR, Baranski M, Nome T, De Rosa MC,  
746 Righino B, Johansen T, Ottera H, Sonesson A, Lien S, Andersen O 2016. Two  
747 adjacent inversions maintain genomic differentiation between migratory and  
748 stationary ecotypes of Atlantic cod. *Mol Ecol.* 25(10): 2130-43.
- 749 Kottler VA, Fadeev A, Weigel D, Dreyer C 2013. Pigment pattern formation in the  
750 guppy, *Poecilia reticulata*, involves the *Kita* and *Csf1ra* receptor tyrosine kinases.  
751 *Genet.* 194(3): 631-646.
- 752 Koyama T, Nakamoto M, Morishima K, Yamashita R, Yamashita T, Sasaki K,  
753 Kuruma Y, Mizuno N, Suzuki M, Okada Y 2019. A SNP in a steroidogenic enzyme is  
754 associated with phenotypic sex in *Seriola* fishes. *Curr Biol.* 29(11): 1901-1909. e8.
- 755 Kwon JY, McAndrew BJ, Penman DJ 2001. Cloning of brain aromatase gene and  
756 expression of brain and ovarian aromatase genes during sexual differentiation in  
757 genetic male and female Nile tilapia *Oreochromis niloticus*. *Molecular Reproduction*  
758 *and Development: Incorporating Gamete Research.* 59(4): 359-370.
- 759 Lampert KP, Schmidt C, Fischer P, Volf J-N, Hoffmann C, Muck J, Lohse MJ, Ryan  
760 MJ, Scharl M 2010. Determination of onset of sexual maturation and mating  
761 behavior by melanocortin receptor 4 polymorphisms. *Curr Biol.* 20(19): 1729-1734.
- 762 Lee B, Hulata G, Kocher T 2004. Two unlinked loci controlling the sex of blue tilapia  
763 (*Oreochromis aureus*). *Hered.* 92(6): 543-549.
- 764 Lee Y-M, Seo JS, Kim I-C, Yoon Y-D, Lee J-S 2006. Endocrine disrupting chemicals  
765 (bisphenol A, 4-nonylphenol, 4-tert-octylphenol) modulate expression of two distinct

- 766 cytochrome P450 aromatase genes differently in gender types of the hermaphroditic  
767 fish *Rivulus marmoratus*. *Biochemical and biophysical research communications*.  
768 345(2): 894-903.
- 769 Li H, Handsaker B, Wysoker A, Fennell T, Ruan J, Homer N, Marth G, Abecasis G,  
770 Durbin R, Genome Project Data Processing S 2009. The Sequence Alignment/Map  
771 format and SAMtools. *Bioinformatics*. 25(16): 2078-2079.
- 772 Li H 2013. Aligning sequence reads, clone sequences and assembly contigs with  
773 BWA-MEM. arXiv preprint arXiv:13033997.
- 774 Lieberman-Aiden E, Van Berkum NL, Williams L, Imakaev M, Ragoczy T, Telling A,  
775 Amit I, Lajoie BR, Sabo PJ, Dorschner MO 2009. Comprehensive mapping of long-  
776 range interactions reveals folding principles of the human genome. *science*.  
777 326(5950): 289-293.
- 778 Lin C-J, Maugars G, Lafont A-G, Jeng S-R, Wu G-C, Dufour S, Chang C-F 2020.  
779 Basal teleosts provide new insights into the evolutionary history of teleost-duplicated  
780 aromatase. *General and comparative endocrinology*. 291: 113395.
- 781 Maglott D, Ostell J, Pruitt KD, Tatusova T 2007. Entrez Gene: gene-centered  
782 information at NCBI. *Nucleic acids research*. 35(suppl\_1): D26-D31.
- 783 Mank J, Avise J 2009. Evolutionary diversity and turn-over of sex determination in  
784 teleost fishes. *Sexual Development*. 3(2-3): 60-67.
- 785 Mank JE, Promislow DE, Avise JC 2006. Evolution of alternative sex-determining  
786 mechanisms in teleost fishes. *Biol J Linn Soc*. 87(1): 83-93.
- 787 Marçais G, Kingsford C 2011. A fast, lock-free approach for efficient parallel counting  
788 of occurrences of k-mers. *Bioinformatics*. 27(6): 764-770.
- 789 Matsuda M, Nagahama Y, Shinomiya A, Sato T, Matsuda C, Kobayashi T, Morrey  
790 CE, Shibata N, Asakawa S, Shimizu N 2002. DMY is a Y-specific DM-domain gene  
791 required for male development in the medaka fish. *Nature*. 417(6888): 559-563.
- 792 Mérot C, Oomen RA, Tigano A, Wellenreuther M 2020. A roadmap for understanding  
793 the evolutionary significance of structural genomic variation. *Trends in Ecology &*  
794 *Evolution*.
- 795 Miguel-Queralto S, Knowlton M, Avvakumov GV, Al-Nouno R, Kelly GM, Hammond  
796 GL 2004. Molecular and functional characterization of sex hormone binding globulin  
797 in zebrafish. *Endocrinology*. 145(11): 5221-5230.
- 798 Moriwake AM, Moriwake VN, Ostrowski AC, Lee C-S 2001. Natural spawning of the  
799 bluefin trevally *Caranx melampygus* in captivity. *Aquaculture*. 203(1-2): 159-164.
- 800 Mylonas CC, Papandroulakis N, Smboukis A, Papadaki M, Divanach P 2004.  
801 Induction of spawning of cultured greater amberjack (*Seriola dumerili*) using GnRH $\alpha$   
802 implants. *Aquaculture*. 237(1-4): 141-154.

- 803 Myosho T, Otake H, Masuyama H, Matsuda M, Kuroki Y, Fujiyama A, Naruse K,  
804 Hamaguchi S, Sakaizumi M 2012. Tracing the emergence of a novel sex-  
805 determining gene in medaka, *Oryzias luzonensis*. *Genet.* 191(1): 163-170.
- 806 Nanda I, Kondo M, Hornung U, Asakawa S, Winkler C, Shimizu A, Shan Z, Haaf T,  
807 Shimizu N, Shima A 2002. A duplicated copy of DMRT1 in the sex-determining  
808 region of the Y chromosome of the medaka, *Oryzias latipes*. *PNAS.* 99(18): 11778-  
809 11783.
- 810 Narasimhan V, Danecek P, Scally A, Xue Y, Tyler-Smith C, Durbin R 2016.  
811 BCFtools/RoH: a hidden Markov model approach for detecting autozygosity from  
812 next-generation sequencing data. *Bioinformatics.* 32(11): 1749-1751.
- 813 Nelson JS, Grande T, Wilson MVH 2016. *Fishes of the world*: John Wiley & Sons.
- 814 Nocillado JN, Biran J, Lee YY, Levavi-Sivan B, Mechaly AS, Zohar Y, Elizur A 2012.  
815 The Kiss2 receptor (Kiss2r) gene in Southern Bluefin Tuna, *Thunnus maccoyii* and in  
816 Yellowtail Kingfish, *Seriola lalandi*—functional analysis and isolation of transcript  
817 variants. *Molecular and cellular endocrinology.* 362(1-2): 211-220.
- 818 Papa Y, Oosting T, Valenza-Troubat N, Wellenreuther M, Ritchie PA 2020. Genetic  
819 stock structure of New Zealand fish and the use of genomics in fisheries  
820 management: an overview and outlook. *New Zeal J Zool*: 1-31.
- 821 Piferrer F, Blázquez M 2005. Aromatase distribution and regulation in fish. *Fish*  
822 *physiology and biochemistry.* 31(2): 215-226.
- 823 Piferrer F 2013. Epigenetics of sex determination and gonadogenesis.  
824 *Developmental Dynamics.* 242(4): 360-370.
- 825 Pla S, Benvenuto C, Capellini I, Piferrer F 2021. Switches, stability and reversals: the  
826 evolutionary history of sexual systems in fish. *bioRxiv*.
- 827 Purcell CM, Seetharam AS, Snodgrass O, Ortega-García S, Hyde JR, Severin AJ  
828 2018. Insights into teleost sex determination from the *Seriola dorsalis* genome  
829 assembly. *BMC genomics.* 19(1): 1-11.
- 830 Putnam NH, O'Connell BL, Stites JC, Rice BJ, Blanchette M, Calef R, Troll CJ,  
831 Fields A, Hartley PD, Sugnet CW 2016. Chromosome-scale shotgun assembly using  
832 an in vitro method for long-range linkage. *Genome research.* 26(3): 342-350.
- 833 Roberts RB, Ser JR, Kocher TD 2009. Sexual conflict resolved by invasion of a novel  
834 sex determiner in Lake Malawi cichlid fishes. *Science.* 326(5955): 998-1001.
- 835 Robertson KM, O'Donnell L, Jones ME, Meachem SJ, Boon WC, Fisher CR, Graves  
836 KH, McLachlan RI, Simpson ER 1999. Impairment of spermatogenesis in mice  
837 lacking a functional aromatase (*cyp 19*) gene. *PNAS.* 96(14): 7986-7991.
- 838 Robinson JT, Thorvaldsdóttir H, Winckler W, Guttman M, Lander ES, Getz G,  
839 Mesirov JP 2011. Integrative genomics viewer. *Nature biotechnology.* 29(1): 24-26.



- 840 Salzburger W, Braasch I, Meyer A 2007. Adaptive sequence evolution in a color  
841 gene involved in the formation of the characteristic egg-dummies of male  
842 haplochromine cichlid fishes. *Bmc Biology*. 5(1): 1-13.
- 843 Sandra G-E, Norma M-M 2010. Sexual determination and differentiation in teleost  
844 fish. *Reviews in Fish Biology and Fisheries*. 20(1): 101-121.
- 845 Santos ME, Braasch I, Boileau N, Meyer BS, Sauteur L, Böhne A, Belting H-G,  
846 Affolter M, Salzburger W 2014. The evolution of cichlid fish egg-spots is linked with a  
847 cis-regulatory change. *Nat Comm*. 5(1): 1-11.
- 848 Schulz RW, Miura T 2002. Spermatogenesis and its endocrine regulation. *Fish*  
849 *physiology and biochemistry*. 26(1): 43-56.
- 850 Simão FA, Waterhouse RM, Ioannidis P, Kriventseva EV, Zdobnov EM 2015.  
851 BUSCO: assessing genome assembly and annotation completeness with single-  
852 copy orthologs. *Bioinformatics*. 31(19): 3210-3212.
- 853 Smit A, Hubley R 2008. RepeatModeler. <http://www.repeatmasker.org>.
- 854 Smith-Vaniz WF, Jelks HL 2006. Australian trevallies of the genus *Pseudocaranx*  
855 (Teleostei: Carangidae), with description of a new species from Western Australia.  
856 *Memoirs of Museum Victoria*. 63(1): 97-106.
- 857 Úbeda-Manzanaro M, Ortiz-Delgado JB, Sarasquete C 2016. The Bromodomain  
858 testis-specific gene (*Brdt*) characterization and expression in gilthead seabream,  
859 *Sparus aurata*, and European seabass, *Dicentrarchus labrax*. *European journal of*  
860 *histochemistry: EJH*. 60(2).
- 861 Valenza-Troubat N, Montanari S, Ritchie PA, Wellenreuther M in preparation.  
862 Unravelling the complex genetic basis of growth in trevally (*Pseudocaranx*  
863 *georgianus*).
- 864 Valenza-Troubat N, Montanari S, Morrison-Whittle P, Ritchie PA, Wellenreuther M in  
865 press. Evaluating new species for aquaculture: A genomic dissection of growth in the  
866 New Zealand silver trevally (*Pseudocaranx georgianus*). *Evol Appl*.
- 867 Viñas J, Piferrer F 2008. Stage-specific gene expression during fish  
868 spermatogenesis as determined by laser-capture microdissection and quantitative-  
869 PCR in sea bass (*Dicentrarchus labrax*) gonads. *Biology of reproduction*. 79(4): 738-  
870 747.
- 871 Vizziano D, Randuineau G, Baron D, Cauty C, Guiguen Y 2007. Characterization of  
872 early molecular sex differentiation in rainbow trout, *Oncorhynchus mykiss*.  
873 *Developmental dynamics: an official publication of the American Association of*  
874 *Anatomists*. 236(8): 2198-2206.
- 875 Volf J 2005. Genome evolution and biodiversity in teleost fish. *Hered*. 94(3): 280-  
876 294.
- 877 von Hofsten J, Olsson P-E 2005. Zebrafish sex determination and differentiation:  
878 involvement of FTZ-F1 genes. *Reproductive Biology and Endocrinology*. 3(1): 1-11.

- 879 Wang D-S, Kobayashi T, Senthilkumaran B, Sakai F, Sudhakumari CC, Suzuki T,  
880 Yoshikuni M, Matsuda M, Morohashi K-i, Nagahama Y 2002. Molecular cloning of  
881 DAX1 and SHP cDNAs and their expression patterns in the Nile tilapia, *Oreochromis*  
882 *niloticus*. *Biochemical and Biophysical Research Communications*. 297(3): 632-640.
- 883 Wellenreuther M, Mérot C, Berdan E, Bernatchez L 2019. Going beyond SNPs: The  
884 role of structural genomic variants in adaptive evolution and species diversification.  
885 *Mol Ecol*. 28(6): 1203-1209.
- 886 Wu G-C, Tomy S, Chang C-F 2008a. The expression of *nr0b1* and *nr5a4* during  
887 gonad development and sex change in protandrous black porgy fish, *Acanthopagrus*  
888 *schlegeli*. *Biology of reproduction*. 78(2): 200-210.
- 889 Wu G-C, Tomy S, Nakamura M, Chang C-F 2008b. Dual roles of *cyp19a1a* in  
890 gonadal sex differentiation and development in the protandrous black porgy,  
891 *Acanthopagrus schlegeli*. *Biology of reproduction*. 79(6): 1111-1120.
- 892 Yamamoto Y, Hattori RS, Patiño R, Strüssmann CA 2019. Environmental regulation  
893 of sex determination in fishes: Insights from Atheriniformes. *Current topics in*  
894 *developmental biology*. 134: 49-69.
- 895 Yano A, Nicol B, Guerin A, Guiguen Y 2011. The duplicated rainbow trout  
896 (*Oncorhynchus mykiss*) T-box transcription factors 1, *tbx1a* and *tbx1b*, are  
897 up-regulated during testicular development. *Molecular reproduction and*  
898 *development*. 78(3): 172-180.
- 899 Yano A, Guyomard R, Nicol B, Jouanno E, Quillet E, Klopp C, Cabau C, Bouchez O,  
900 Fostier A, Guiguen Y 2012. An immune-related gene evolved into the master sex-  
901 determining gene in rainbow trout, *Oncorhynchus mykiss*. *Curr Biol*. 22(15): 1423-  
902 1428.
- 903 Yokoi H, Kobayashi T, Tanaka M, Nagahama Y, Wakamatsu Y, Takeda H, Araki K,  
904 Morohashi KI, Ozato K 2002. *Sox9* in a teleost fish, medaka (*Oryzias latipes*):  
905 evidence for diversified function of *Sox9* in gonad differentiation. *Molecular*  
906 *Reproduction and Development: Incorporating Gamete Research*. 63(1): 5-16.
- 907



908 **Tables**

909 **Table 1: The 24 anchored trevally chromosomes (following Valenza-Troubat et al. in**  
910 **preparation) and the corresponding scaffold names and their respective lengths (bp).**

911 **Note, that the scaffold\_001800 is located on Chromosome 21, making this the sex**  
912 **chromosome.**

| <b>Anchored chromosome</b>  | <b>Scaffold name</b> | <b>Length (bp)</b> |
|-----------------------------|----------------------|--------------------|
| Chr01                       | scaffold_000114      | 24151137           |
| Chr02                       | scaffold_000147      | 28820665           |
| Chr03                       | scaffold_001154      | 27945907           |
| Chr04                       | scaffold_001701      | 22194978           |
| Chr05                       | scaffold_000836      | 22952508           |
| Chr06                       | scaffold_001460      | 31062029           |
| Chr07                       | scaffold_000312      | 24419205           |
| Chr08                       | scaffold_000453      | 26980729           |
| Chr09                       | scaffold_001891      | 28251306           |
| Chr10                       | scaffold_001025      | 26936208           |
| Chr11                       | scaffold_001200      | 18865379           |
| Chr12                       | scaffold_000118      | 26912610           |
| Chr13                       | scaffold_001584      | 22008664           |
| Chr14                       | scaffold_000429      | 25278635           |
| Chr15                       | scaffold_001123      | 23296617           |
| Chr16                       | scaffold_000874      | 26415528           |
| Chr17                       | scaffold_000314      | 22912052           |
| Chr18                       | scaffold_001965      | 19902634           |
| Chr19                       | scaffold_001072      | 19893011           |
| Chr20                       | scaffold_000070      | 24159416           |
| Chr21*                      | scaffold_001800      | 27791086           |
| Chr22                       | scaffold_000657      | 25934954           |
| Chr23                       | scaffold_000099      | 16759215           |
| Chr24                       | scaffold_000328      | 11005663           |
| Total anchored              |                      | 574850136          |
| Unanchored scaffolds        |                      | 4556253            |
| Total anchored + unanchored |                      | 579406389          |

\*: sex-linked

913 Table 2. Overview of female and male differences in homo/heterozygosity and Indels. The blue highlighted cells contain data of the  
 914 000374 SDR region and the orange highlighted cells contain data of the 001800 (chromosome 21) SDR region. Next to the SDR  
 915 data the highlighted regions also contain 3 randomly selected genomic regions of the same size and their data to show how  
 916 differential the SDR is compared to a regular genomic region.

| Scaffold         | Female DELS | Male DELS | Full hetero male and homo female | Full homo female and hetero male | Homo males | Homo females | Hetero males | Hetero females | Hetero ratio(male/female) | Homo ratio(male/female) | Ratio difference |
|------------------|-------------|-----------|----------------------------------|----------------------------------|------------|--------------|--------------|----------------|---------------------------|-------------------------|------------------|
| Scaffold 001800  | 185         | 0         | 0                                | 8                                | 326        | 252          | 546          | 283            | 1.929328622               | 1.293650794             | 0.635677828      |
| Scaffold R1_6000 | 5           | 24        | 0                                | 0                                | 478        | 462          | 725          | 637            | 1.138147567               | 1.034632035             | 0.103515532      |
| Scaffold R2_6000 | 3           | 1         | 0                                | 0                                | 233        | 186          | 286          | 243            | 1.176954733               | 1.252688172             | 0.07573344       |
| Scaffold R3_6000 | 0           | 0         | 0                                | 0                                | 270        | 202          | 322          | 276            | 1.166666667               | 1.336633663             | 0.169966997      |
| Scaffold 000374  | 233         | 0         | 0                                | 3                                | 331        | 154          | 462          | 163            | 2.834355828               | 2.149350649             | 0.685005179      |
| Scaffold R1_3000 | 6           | 4         | 0                                | 0                                | 299        | 232          | 360          | 306            | 1.176470588               | 1.288793103             | 0.112322515      |
| Scaffold R2_3000 | 15          | 17        | 0                                | 0                                | 863        | 732          | 1180         | 1011           | 1.167161227               | 1.178961749             | 0.011800522      |
| Scaffold R3_3000 | 2           | 0         | 0                                | 0                                | 820        | 724          | 1015         | 868            | 1.169354839               | 1.132596685             | 0.036758154      |

917 Table 3. Gene hits from NCBI BLAST v2.2.25 after querying the unsexed reference genome with candidate sex determination  
 918 genes on the SDR. This data has been filtered on a bit score of >100, an E-value of >1e-10 and an alignment length of >99.

| Gene identifier | Gene name | Scaffold | Identity | Align length | Mismatches | Gaps | qstart | qend | sstart | send | E-value  | Bit score |
|-----------------|-----------|----------|----------|--------------|------------|------|--------|------|--------|------|----------|-----------|
| XM_020703654.   | Cyp19b    | 000374   | 78.98    | 176          | 25         | 12   | 1561   | 1730 | 1804   | 1635 | 9.00E-22 | 110       |
| XM_011475857.   | Cyp19b    | 000374   | 78.98    | 176          | 25         | 12   | 1567   | 1736 | 1804   | 1635 | 9.00E-22 | 110       |
| XM_020703653.   | Cyp19b    | 000374   | 78.98    | 176          | 25         | 12   | 1464   | 1633 | 1804   | 1635 | 8.00E-22 | 110       |
| XM_011475857.   | Cyp19b    | 001800   | 83.69    | 141          | 19         | 4    | 1128   | 1266 | 412    | 274  | 7.00E-28 | 130       |
| HQ449733.1      | Cyp19a1   | 001800   | 88.07    | 109          | 11         | 2    | 472    | 579  | 631    | 524  | 7.00E-28 | 128       |
| HQ449733.1      | Cyp19a1   | 001800   | 84.85    | 165          | 19         | 6    | 189    | 350  | 1494   | 1333 | 7.00E-38 | 161       |
| XM_020703653.   | Cyp19b    | 001800   | 83.69    | 141          | 19         | 4    | 1025   | 1163 | 412    | 274  | 6.00E-28 | 130       |
| AY273211.1      | Cyp19a1   | 001800   | 87.43    | 175          | 16         | 6    | 946    | 1117 | 412    | 241  | 6.00E-48 | 196       |
| XM_020703654.   | Cyp19b    | 001800   | 81.5     | 173          | 23         | 9    | 1128   | 1295 | 412    | 244  | 5.00E-29 | 134       |
| NM_001105093.   | Cyp19b    | 001800   | 81.93    | 166          | 22         | 8    | 951    | 1112 | 412    | 251  | 5.00E-29 | 134       |
| AY273211.1      | Cyp19a1   | 001800   | 79.87    | 149          | 24         | 6    | 400    | 545  | 1755   | 1610 | 4.00E-20 | 104       |
| AY273211.1      | Cyp19a1   | 000374   | 82.77    | 238          | 31         | 10   | 1111   | 1343 | 2359   | 2127 | 3.00E-50 | 204       |
| NM_001105093.   | Cyp19b    | 000374   | 79.43    | 175          | 26         | 10   | 1366   | 1535 | 1804   | 1635 | 2.00E-23 | 115       |

|            |         |        |       |     |    |    |      |      |      |      |          |     |
|------------|---------|--------|-------|-----|----|----|------|------|------|------|----------|-----|
| AY273211.1 | Cyp19a1 | 000374 | 78.82 | 255 | 43 | 10 | 1355 | 1602 | 1810 | 1560 | 2.00E-37 | 161 |
| AY273211.1 | Cyp19a1 | 001800 | 82.8  | 157 | 21 | 6  | 249  | 402  | 2010 | 1857 | 1.00E-29 | 135 |
| AY273211.1 | Cyp19a1 | 001800 | 81.41 | 156 | 23 | 6  | 555  | 707  | 1494 | 1342 | 1.00E-25 | 122 |

919 **Figures**

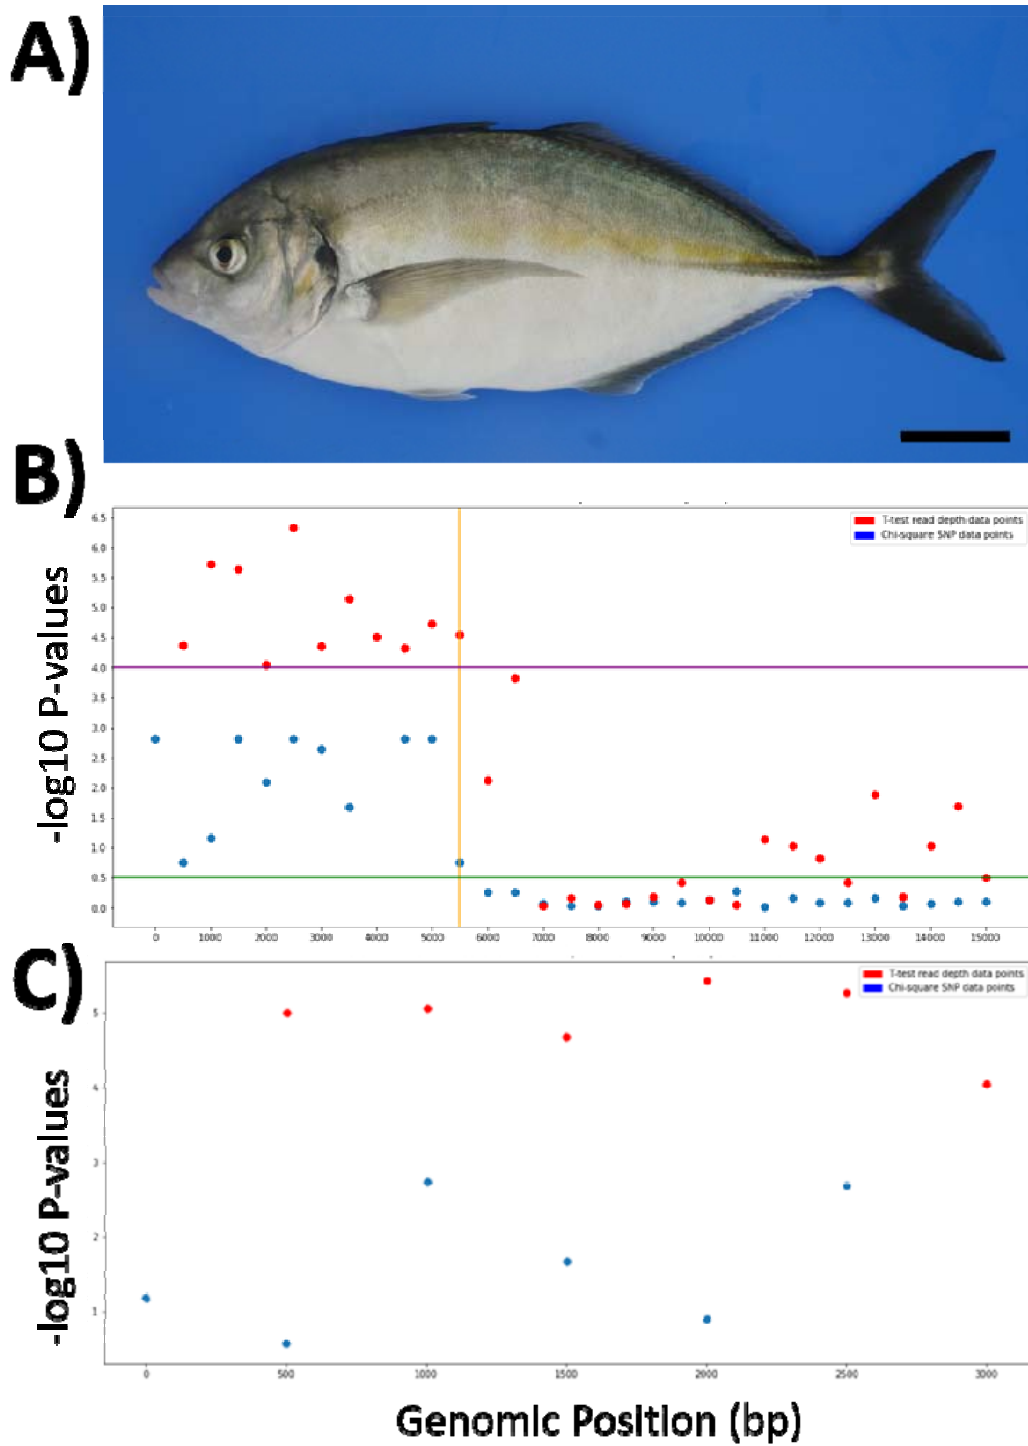

921 **Figure 1. Panel A)** shows a trevally individual from the breeding programme at Plant  
922 and Food Research in Nelson, New Zealand. The black scale bar is 5 cm. **Panel B)**  
923 shows the  $-\log_{10}$  P-values on the y-axis versus the genomic position (bp) on  
924 chromosome 21 (001800 scaffold) on the x axis in windows of 500 bases. **Panel C)**  
925 shows the  $-\log_{10}$  P-values on the y-axis versus the genomic position (bp) scaffold  
926 000374 on the x axis in windows of 500 bases.  $-\log_{10}$  p-values were determined  
927 from p-values derived from t-tests (R) and from chi-square contingency tests  
928 (Python). A purple line is drawn at a  $-\log_{10}$  p-value of 4.0 for chromosome 21 to  
929 indicate a threshold for divergent windows for t-test read depth data points, a green  
930 line at a  $-\log_{10}$  p-value of 0.5 on chromosome 21 does the same for chi-square  
931 SNP data points. An orange line is drawn at a base position of 5500 to show where  
932 the SDR of chromosome 21 ends. Red dots indicate results from the t-test read  
933 depth analysis and blue dots SNP results from the chi-square test.

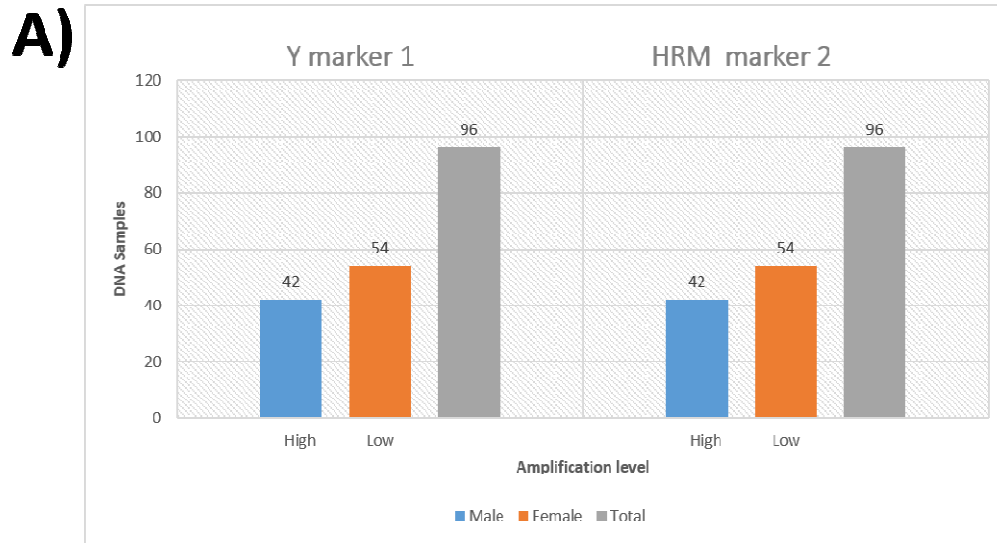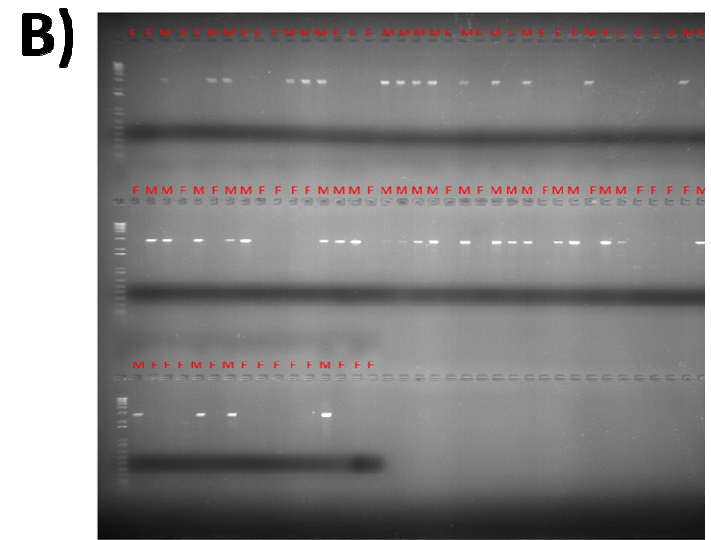

934

935

936 **Figure 2. Panel A)** Bar plot made from Y marker 1 and HRM marker 2 measured cycle amplification levels from running HRM on a  
 937 LightCyler480(Roche) real time PCR instrument for males (blue) and females (orange). The Y-axis is the amount of DNA samples  
 938 and the labels high or low indicate amplification levels. **Panel B)** 0.9% agarose gel stained with RedSafe™, which represents PCR  
 939 products (~2.5 kb) from the sex-specific gene-wide marker. With red text above each slot containing either an M (Male) or F  
 940 (Female).



941 **Supplementary data**

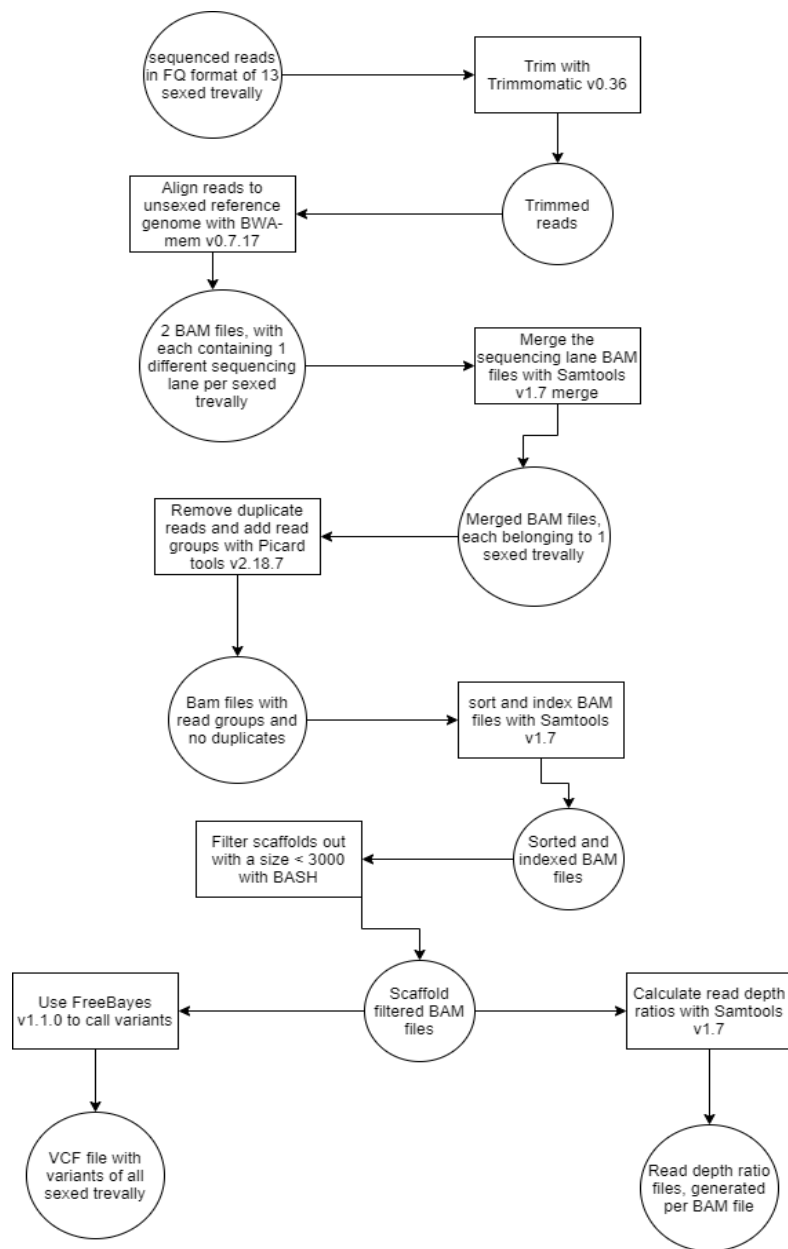

942

943

944 **Supplementary Figure 1.** The overview of generating read depth and variant data

945

from the sequences genomes of 13 sexed trevally.

946

947 **Supplementary Table 1.** Description of the 64 sex candidate genes mined from  
948 literature (Gutbrod and Schartl 1999; Guan et al. 2000; Nanda et al. 2002; Wang et  
949 al. 2002; Yokoi et al. 2002; Lee et al. 2004; Miguel-Queralt et al. 2004; von Hofsten  
950 and Olsson 2005; Salzburger et al. 2007; Vizziano et al. 2007; Ijiri et al. 2008; Wu et  
951 al. 2008a; Roberts et al. 2009; Fuji et al. 2010; Lampert et al. 2010; Gunter et al.  
952 2011; Yano et al. 2011; Hattori et al. 2012; Kamiya et al. 2012; Myosho et al. 2012;  
953 Nocillado et al. 2012; Yano et al. 2012; Böhne et al. 2013; Dooley et al. 2013;  
954 Forconi et al. 2013; Kottler et al. 2013; Santos et al. 2014; Úbeda-Manzanaro et al.  
955 2016; Purcell et al. 2018). All candidate genes are sorted alphabetically on the gene  
956 sex region description column.

| <b>Candidate sex gene description</b>                                                                                                                      |
|------------------------------------------------------------------------------------------------------------------------------------------------------------|
| <i>adcy5</i> ( <i>adenylate cyclase 5</i> ), patterning of fish color ornaments in male fish.                                                              |
| <i>amh</i> ( <i>anti-Müllerian hormone</i> ), male sex differentiation in mammals, regulation of sex hormones, dimorphic in brain development.             |
| <i>amhr2</i> ( <i>anti-Müllerian hormone (AMH) receptor type 2</i> ), involved in male sex differentiation.                                                |
| <i>amhy</i> ( <i>anti-Müllerian hormone on Y-chromosome</i> ), a duplicated version of <i>amh</i> that found its way onto the Y chromosome.                |
| <i>ar</i> ( <i>androgen receptor</i> ), a nuclear receptor that is activated by androgenic hormone binding.                                                |
| <i>brdt</i> ( <i>bromodomain protein transcript variant 2</i> ), see below.                                                                                |
| <i>brdt</i> ( <i>bromodomain testis associated</i> ), involvement in elongating spermatids, and is required for proper spermatogenesis and male fertility. |
| <i>copz-1</i> ( <i>coatamer protein complex, subunit zeta-1</i> ), development of color dimorphism between sexes.                                          |

|                                                                                                                                                                                                       |
|-------------------------------------------------------------------------------------------------------------------------------------------------------------------------------------------------------|
| <p><i>csf1ra</i> (<i>colony stimulating factor 1 receptor a</i>), type III receptor tyrosine kinase of egg spot tissue related to sex.</p>                                                            |
| <p><i>ctnnb1</i> (<i>catenin (cadherin-associated) beta</i>), intracellular signal transducer, part of the wnt pathway, interactions with androgens, teleost A-copy.</p>                              |
| <p><i>cyp11b2</i> (<i>cytochrome P450 family 11 subfamily B polypeptide 2</i>), steroid hydroxylase, contributes to the synthesis of 11-ketotestosterone, the most potent androgen in teleosts.</p>   |
| <p><i>cyp17a1</i> (<i>family 17, subfamily A, polypeptide 1</i>), formation (synthesis) of steroid hormones. This group of hormones includes sex hormones such as testosterone and estrogen.</p>      |
| <p><i>cyp19a1a</i> (<i>aromatase cytochrome P450 family 19 subfamily A polypeptide 1 A</i>), monooxygenase involved in estrogen biosynthesis, teleost A-copy (also known as ovarian aromatase).</p>   |
| <p><i>cyp19a1b</i> (<i>aromatase cytochrome P450 family 19 subfamily A polypeptide 1</i>), see above, teleost Bcopy (also known as brain aromatase).</p>                                              |
| <p><i>dax1</i> (<i>dosage-sensitive sex reversal adrenal hypoplasia critical region on chromosome X gene 1</i>), orphan receptor, negative regulates steroidogenesis, interacts with <i>sf-1</i>.</p> |
| <p><i>dhh</i> (<i>desert hedgehog</i>), cell signaling involved in male sex differentiation (in the form of morphogenesis).</p>                                                                       |
| <p><i>dmo</i> (<i>DM-domain gene in ovary</i>), DM-domain cDNA in ovary.</p>                                                                                                                          |
| <p><i>dmrt1</i> (<i>doublesex and mab-3 related transcription factor 1</i>), transcription factor, regulation of male sex differentiation.</p>                                                        |
| <p><i>dmrt1bY</i> (<i>doublesex and mab-3 related transcription factor 1b on Y-chromosome</i>), a duplicated version of <i>Dmrt1</i> that found its way onto the Y chromosome.</p>                    |

|                                                                                                                                                                                      |
|--------------------------------------------------------------------------------------------------------------------------------------------------------------------------------------|
| <p><i>dmrt3</i> (<i>doublesex and mab-3 related transcription factor 3</i>), involved in male sex determination.</p>                                                                 |
| <p><i>esr1</i> (<i>estrogen receptor 1</i>), receptor that is activated by the estrogen hormone.</p>                                                                                 |
| <p><i>fgf20</i> (<i>fibroblast growth factor 20</i>), growth factor involved in male sex development.</p>                                                                            |
| <p><i>fgf9</i> (<i>fibroblast growth factor 9</i>), growth factor involved in male sex development.</p>                                                                              |
| <p><i>fh12</i> (<i>the four and a half LIM domain protein 2</i>), Egg spot formation related to sex.</p>                                                                             |
| <p><i>Follistatin</i> (<i>fst</i>), ovarian differentiation (through follicle stimulating hormone).</p>                                                                              |
| <p><i>foxl2</i> (<i>forkhead transcription factor L2</i>), transcription factor, possible role in ovarian development and function.</p>                                              |
| <p><i>gata4</i> (<i>GATA binding protein 4</i>), transcription factor, reproductive/gonad development and function.</p>                                                              |
| <p><i>GM354</i>, <i>UNH168</i>, <i>GM271</i>, <i>UNH131</i>, <i>UNH971</i>, <i>UNH213</i>, <i>UNH868</i>, Presumed sex determination region based on male/female marker testing.</p> |
| <p><i>gsdf</i> (<i>gonadal somatic cell derived factor</i>), gonadal soma derived growth factor on the Y chromosome.</p>                                                             |
| <p><i>hsd17b1</i> (<i>hydroxysteroid 17-beta dehydrogenase 1</i>), a dual function in estrogen activation and androgen inactivation.</p>                                             |
| <p><i>hsd17b3</i> (<i>hydroxysteroid 17-beta dehydrogenase 3 protein coding</i>), catalyzes the conversion of androstenedione to testosterone.</p>                                   |
| <p><i>kiss2r</i> (<i>Kiss2 receptor</i>), role in reproductive function in vertebrates, particularly in the onset of puberty.</p>                                                    |

|                                                                                                                                                                         |
|-------------------------------------------------------------------------------------------------------------------------------------------------------------------------|
| <p><i>kita</i> (receptor tyrosine kinases), required for the development of color ornaments of males.</p>                                                               |
| <p><i>mc4r</i> (melanocortin 4 receptor), male size and behavior polymorphisms.</p>                                                                                     |
| <p><i>nanos1A</i> (Nanos homolog 1 A), brain and germ cell development, teleost A-copy.</p>                                                                             |
| <p><i>nanos1B</i> (Nanos homolog 1 B), see above, teleost B-copy.</p>                                                                                                   |
| <p><i>nr5a1a</i> (nuclear receptor subfamily 5, group A, member 1 A), an important factor for steroidogenesis and sex differentiation.</p>                              |
| <p><i>nr5a2</i> (nuclear receptor subfamily 5, group A, member 2), involved in steroidogenesis, also known as Irh-1 or FTZ-F1.</p>                                      |
| <p><i>nr5a5</i> (nuclear receptor subfamily 5, group A, member 5), related to <i>sf-1</i>, gene of the <i>nr5a</i> family, regulation of sterol/steroid metabolism.</p> |
| <p><i>pax7</i> (paired box 7 in PAX family of transcription factors), regulation of melanocytes related to sex.</p>                                                     |
| <p><i>pdgfa</i> (platelet derived growth factor subunit A), signaling molecules involved in male sex differentiation.</p>                                               |
| <p><i>pdgfrb</i> (platelet derived growth factor receptor beta), signaling molecules involved in male sex differentiation.</p>                                          |
| <p><i>rspo1</i> (R-spondin-1), activates wnt/beta-catenin pathway in ovarian differentiation in mammals.</p>                                                            |
| <p><i>sdY</i> (the sexually dimorphic on the Y-chromosome gene), a conserved male-specific Y-chromosome sequence.</p>                                                   |
| <p><i>sequ21</i>, <i>Sequ320</i>, <i>Sequ230</i> (marker regions), sexual determining marker regions</p>                                                                |

|                                                                                                                                                                      |
|----------------------------------------------------------------------------------------------------------------------------------------------------------------------|
| based on linkage analysis.                                                                                                                                           |
| <i>Sf-1 (nr5a1, steroidogenic factor 1)</i> , orphan nuclear receptor, controls sexual development and Reproduction.                                                 |
| <i>shbg (sex hormone-binding globulin)</i> , globulin that binds sex hormones on its receptor.                                                                       |
| <i>shp (short heterodimer partner, NR0B2)</i> , development Ligand-independent activation(due to homology classified as a receptor) of <i>ESR1</i> and <i>ESR2</i> . |
| <i>slc45a2 (solute carrier family 45 member 2)</i> , part of sex linkage group required for sex related chromatophores.                                              |
| <i>sox10 (SRY (sex determining region Y)-box 10)</i> , regulating male sexual development.                                                                           |
| <i>sox3 (SRY (sex determining region Y)-box 3)</i> , necessary for initiating male sex determination by directing the development of supporting cell precursors.     |
| <i>sox8 (SRY (sex determining region Y)-box 8)</i> , regulating male sexual development.                                                                             |
| <i>sox9 (SRY (sex determining region Y)-box 9)</i> , transcription factor, regulates <i>amh</i> expression together with <i>sf-1</i> , gonad development.            |
| <i>Spra (Sepiapterin Reductase)</i> , part of sex linkage group required for sex related chromatophores.                                                             |
| <i>srd5a1 (steroid 5 alpha-reductase 1)</i> , catalyzes the conversion of testosterone into the more potent androgen, dihydrotestosterone.                           |
| <i>srd5a2 (steroid 5 alpha-reductase 2)</i> , catalyzes the conversion of testosterone into the more potent androgen, dihydrotestosterone.                           |
| <i>srd5a3 (steroid 5 alpha-reductase 3)</i> , catalyzes the conversion of testosterone into the more potent androgen, dihydrotestosterone. <sup>22</sup>             |



|                                                                                                                                                                  |
|------------------------------------------------------------------------------------------------------------------------------------------------------------------|
| <p><i>Star</i> (<i>steroidogenic acute regulatory protein</i>), cholesterol transference in mitochondria.</p>                                                    |
| <p><i>tbx1a</i> (<i>T-box transcription factor 1 a</i>), t-box transcription factor gene family involved in embryogenesis and organogenesis, teleost A-copy.</p> |
| <p><i>tbx1b</i> (<i>T-box transcription factor 1 b</i>), see above, teleost B-copy.</p>                                                                          |
| <p><i>tdrd1</i> (<i>tudor domain containing 1</i>), presumed germ cell formation.</p>                                                                            |
| <p><i>wnt4</i> (<i>wingless-type MMTV integration site family member 4</i>), presumed to be crucial for mammalian ovary development.</p>                         |
| <p><i>wt1A</i> (<i>Wilms tumor 1 A</i>), transcription factor, gonad development, interacts with <i>sf-1</i>.</p>                                                |
| <p><i>xmrk</i> (<i>receptor tyrosine kinase</i>), pigment pattern formation related to sex.</p>                                                                  |

957

958

959 **Supplementary Table 2.** Primers names, sequence information, expected product  
960 sizes and annealing temperatures, for validation PCR. Accession numbers of  
961 orthologous genes at NCBI of the gene-wide designed primers are given. The cells  
962 with bold green letters represent the primers that were successful.

| <b>Gene wide primers</b> |                              |              |                       |                   |
|--------------------------|------------------------------|--------------|-----------------------|-------------------|
| Name of the primer       | Sequence                     | Size product | Annealing temperature | Gene origin       |
| TRE_Cyp19a_FW1           | GGAAGTCGTGCATGTTCAAAG        | 649          | 60                    | HQ449733.1        |
| TRE_Cyp19a_RV1           | TGGTCTGTCTGCTGCTGGT          | 649          | 60                    | HQ449733.1        |
| <b>TRE_Cyp19a_FW2</b>    | <b>TGAAAGGAAGTCGTGCATGTT</b> | <b>654</b>   | <b>60</b>             | <b>HQ449733.1</b> |
| <b>TRE_Cyp19a_RV2</b>    | <b>TGGTCTGTCTGCTGCTGGT</b>   | <b>654</b>   | <b>60</b>             | <b>HQ449733.1</b> |
| TRE_Cyp19a_FW3           | CGTGCATGTTCAAAGTCAAATC       | 643          | 60                    | HQ449733.1        |
| TRE_Cyp19a_RV3           | TGGTCTGTCTGCTGCTGGT          | 643          | 60                    | HQ449733.1        |
| TRE_Cyp19a_FW4           | ATACTGCATTTCCGGTTCCA         | 610          | 60                    | HQ449733.1        |
| TRE_Cyp19a_RV4           | TGGTCTGTCTGCTGCTGGT          | 610          | 60                    | HQ449733.1        |
| TRE_Cyp19a_FW5           | TACTGCATTTCCGGTTCCA          | 609          | 60                    | HQ449733.1        |
| TRE_Cyp19a_RV5           | TGGTCTGTCTGCTGCTGGT          | 609          | 60                    | HQ449733.1        |

963

964 **Supplementary Table 3.** Primers names, sequence information, expected product  
 965 sizes and annealing temperatures for PCR testing. The gene origin accession codes  
 966 of the Y-only (Y-chromosome parts). The cells with bold green letters represent the  
 967 primers that were successful.

| <b>Y-only primers</b> |                             |              |                       |                       |
|-----------------------|-----------------------------|--------------|-----------------------|-----------------------|
| Primer name           | Sequence                    | Size product | Annealing temperature | Gene origin           |
| FW1_631_524           | TCAGTGGTGAAGTTGATGTGG       | 111          | 60.74                 | HQ449733.1            |
| RV1_631_524           | TGTGTTGTGCTTCAGTCAGGA       | 111          | 60.74                 | HQ449733.1            |
| FW2_631_524           | TGTGGTCAAGCTTCTCCGC         | 98           | 60.30                 | HQ449733.1            |
| RV2_631_524           | GTGTGTGTTGTGCTTCAGTCA       | 98           | 60.22                 | HQ449733.1            |
| FW3_631_524           | GTGAAGTTGATGTGGTCCAGC       | 103          | 60.81                 | HQ449733.1            |
| RV3_631_524           | TGTTGTGCTTCAGTCAGGAGC       | 103          | 60.81                 | HQ449733.1            |
| FW4_631_524           | GTTGATGTGGTCCAGCTTCTC       | 102          | 61.20                 | HQ449733.1            |
| RV4_631_524           | TGTGTGTTGTGCTTCAGTCAG       | 102          | 61.26                 | HQ449733.1            |
| FW1_1494_1333         | AGACTGTGCAGCTGGTCCA         | 76           | 61.14                 | HQ449733.1            |
| RV1_1494_1333         | CAGGTCCAGGTCTGCAGAAC        | 76           | 60.32                 | HQ449733.1            |
| FW2_1494_1333         | TGTCCTCTCACCGTCCACAG        | 113          | 61.18                 | HQ449733.1            |
| RV2_1494_1333         | TGGACCAGCTGCACAGTCT         | 113          | 61.14                 | HQ449733.1            |
| <b>FW1_412_241</b>    | <b>GGTGTGATCTCCTCCAGCA</b>  | <b>104</b>   | <b>61.32</b>          | <b>NM_001105093.2</b> |
| <b>RV1_412_241</b>    | <b>TGATCGCGGCTCCAGTAACT</b> | <b>104</b>   | <b>61.32</b>          | <b>NM_001105093.2</b> |
| FW2_412_241           | GTCGATCTCCTCCAGCAGCT        | 79           | 61.39                 | NM_001105093.2        |
| RV2_412_241           | GTCCATCAGCCTCTTCTTCAT       | 79           | 61.54                 | NM_001105093.2        |
| FW1_1810_1560         | CAGGTTGTTGGTCTGCAGGA        | 83           | 60.18                 | NM_001105093.2        |

|               |                       |     |       |                |
|---------------|-----------------------|-----|-------|----------------|
| RV1_1810_1560 | TCCTGGTGACGCTGCTTTC   | 83  | 60.30 | NM_001105093.2 |
| FW2_1810_1560 | GTCGGCTCAGGAAGGTCATG  | 84  | 60.46 | NM_001105093.2 |
| RV2_1810_1560 | AGACCAACAACCTGTGGCAG  | 84  | 60.47 | NM_001105093.2 |
| FW3_1810_1560 | CAGTTTCCTCTATGTCGGCTC | 100 | 60.74 | NM_001105093.2 |
| RV3_1810_1560 | TGCAGACCAACAACCTGTGG  | 100 | 60.75 | NM_001105093.2 |
| FW4_1810_1560 | TTCCAGTTTCCTCTATGTCGG | 106 | 60.09 | NM_001105093.2 |
| RV4_1810_1560 | TCCTGCAGACCAACAACCTG  | 106 | 60.18 | NM_001105093.2 |
| FW1_2010_1857 | AGCGTCTCCTCTCCGTTGATC | 117 | 61.62 | AY273211.1     |
| RV1_2010_1857 | GGGGCCTCTTCTCTCCTACAT | 117 | 61.61 | AY273211.1     |
| FW2_2010_1857 | ATCCAAACTCTCACCATGTCT | 100 | 60.05 | AY273211.1     |
| RV2_2010_1857 | TGGGGCCTCTTCTCTCCTAC  | 100 | 60.03 | AY273211.1     |

969 **Supplementary Table 4.** Primer names, sequences, size of product, annealing  
 970 temperature for PCR and gene origin accession code of the HRM designed primers  
 971 for validation. The cells with bold green letters represent the primers that turned out  
 972 to be successful markers.

| <b>HRM primers</b>   |                            |              |                       |                   |
|----------------------|----------------------------|--------------|-----------------------|-------------------|
| Name primer          | Sequence                   | Size product | Annealing temperature | Gene origin       |
| FW1_2359_2127        | GATGATGTTTGTGCCTCTTG       | 195          | 59.83                 | AY273211.1        |
| RV1_2359_2127        | ACTGACAGGTTGGTTCCTC        | 195          | 58.19                 | AY273211.1        |
| <b>FW2_2359_2127</b> | <b>GGATGATGTTTGTGCCTCT</b> | <b>196</b>   | <b>59.83</b>          | <b>AY273211.1</b> |
| <b>RV2_2359_2127</b> | <b>ACTGACAGGTTGGTTCCTC</b> | <b>196</b>   | <b>58.19</b>          | <b>AY273211.1</b> |
| FW3_2359_2127        | TGAGGATGATGTTTGTGCC        | 199          | 59.69                 | AY273211.1        |
| RV3_2359_2127        | ACTGACAGGTTGGTTCCTC        | 199          | 58.19                 | AY273211.1        |
| FW4_2359_2127        | GATGATGTTTGTGCCTCTTG       | 195          | 59.83                 | AY273211.1        |
| RV4_2359_2127        | ACTGACAGGTTGGTTCCTC        | 195          | 59.90                 | AY273211.1        |
| FW5_2359_2127        | GGATGATGTTTGTGCCTCTT       | 196          | 59.83                 | AY273211.1        |
| RV5_2359_2127        | ACTGACAGGTTGGTTCCTC        | 196          | 59.90                 | AY273211.1        |
| FW1_1211_1125        | TGCTGAAATGGCTCCTACA        | 195          | 60.22                 | HQ449733.         |
| RV1_1211_1125        | GTGTGTGAACTGTGTGTGT        | 195          | 59.20                 | HQ449733.         |
| FW2_1211_1125        | TGCTGAAATGGCTCCTACA        | 195          | 58.56                 | HQ449733.         |
| RV2_1211_1125        | GTGTGTGAACTGTGTGTGT        | 195          | 59.20                 | HQ449733.         |
| FW3_1211_1125        | TGCTGAAATGGCTCCTACA        | 196          | 60.22                 | HQ449733.         |
| RV3_1211_1125        | AGTGTGTGAACTGTGTGTG        | 196          | 58.92                 | HQ449733.         |
| FW4_1211_1125        | TGCTGAAATGGCTCCTACA        | 197          | 60.22                 | HQ449733.         |
| RV4_1211_1125        | GAGTGTGTGAACTGTGTGT        | 197          | 59.91                 | HQ449733.         |
| FW5_1211_1125        | GCTGAAATGGCTCCTACAA        | 195          | 58.56                 | HQ449733.         |

|                       |                      |     |       |           |
|-----------------------|----------------------|-----|-------|-----------|
| RV5_1211_1125         | AGTGTGTGAACTGTGTGTG  | 195 | 58.92 | HQ449733. |
| FW1_13047900_1304800  | CAAGGGTTGGGTCTTCTCG  | 100 | 60.32 | No gene   |
| RV1_13047900_13048000 | CCAGGCTGCTTCATCCTCTT | 100 | 59.74 | No gene   |
| FW2_13047900_1304800  | ACAAGGGTTGGGTCTTCTC  | 101 | 59.60 | No gene   |
| RV2_13047900_13048000 | CCAGGCTGCTTCATCCTCTT | 101 | 59.74 | No gene   |
| FW3_13047900_1304800  | TTCTCGGACCCTGGACTGT  | 87  | 59.59 | No gene   |
| RV3_13047900_13048000 | CCAGGCTGCTTCATCCTCTT | 87  | 59.74 | No gene   |
| FW4_13047900_1304800  | AAGGGTTGGGTCTTCTCGG  | 99  | 60.47 | No gene   |
| RV4_13047900_13048000 | CCAGGCTGCTTCATCCTCTT | 99  | 59.74 | No gene   |
| FW5_13047900_1304800  | CAAGGGTTGGGTCTTCTCG  | 102 | 60.32 | No gene   |
| RV5_13047900_13048000 | GTCCAGGCTGCTTCATCCT  | 102 | 60.46 | No gene   |
